# Supplementary material for: Comparative Characterization of Immune Response in Sheep With Caseous Lymphadenitis Through Analysis of the Whole Blood Transcriptome
Source: Preprints.org preprint supplement (doi:10.20944/preprints202305.2113.v1), 2023-05-30
Supplement: Supplementary file 1 [file Supplementary Table 1.xlsx]

## Sheet: List1
TaqMan Gene Ovine Expression Assays
Assay ID	Gene Symbol	Gene Name	Gene status	Entrez Gene ID	Transcript Accession	Amplicon size
Oa03214022_m1	MFAP5	microfibril associated protein 5	target	101102052	XM_015094962.2; XM_015094961.2	72
Oa03257092_m1	MEDAG	mesenteric estrogen dependent adipogenesis	target	101111297	XM_004012140.4	67
Oa04792660_m1	HMCN1	hemicentin 1	target	101109289	XM_027975960.1; XM_004013873.4	66
Oa04797216_g1	LY6G6C	lymphocyte antigen 6 family member G6C	target	101118646	XM_004018943.4	76
Oa04806836_m1	POLR2A	RNA polymerase II subunit A	reference	100144762	XM_004013289.4	49
Oa04905906_m1	PPIB	peptidylprolyl isomerase B	reference	554319	XM_004010536.4	83
Oa04818291_m1	B2M	beta-2-microglobulin	reference	114108604	XM_012180604.2	119
