# Supplementary material for: Comparative Characterization of Immune Response in Sheep With Caseous Lymphadenitis Through Analysis of the Whole Blood Transcriptome
Source: Preprints.org preprint supplement (doi:10.20944/preprints202305.2113.v1), 2023-05-30
Supplement: Supplementary file 2 [file Supplementary Table 2.xlsx]

## Sheet: DESeq2 CNxEP
Differentially expressed transcripts between CN and EP groups
Contig	Description	Shortcut	Type	log2FoldChange	lfcSE	stat	pvalue	padj
>XM_027958759.1_PREDICTED:_Ovis_aries	MHC_class_I_polypeptide-related_sequence_B	MICB	transcript_variant_X1,_mRNA	4.37387	0.526347	8.30986	9.58112e-17	2.6327e-12
>XM_004016241.3_PREDICTED:_Ovis_aries	hemoglobin_fetal_subunit_beta	HBB	mRNA	-2.6632	0.342448	-7.77693	7.43038e-15	1.02086e-10
>XM_027958882.1_PREDICTED:_Ovis_aries	BOLA_class_I_histocompatibility_antigen,_alpha_chain_BL3-7-like	OLA-I	transcript_variant_X4,_mRNA	4.27087	0.578893	7.37766	1.61101e-13	1.47557e-09
>NM_001113425.2_Ovis_aries	beta-C_globin	HBBC	mRNA	-3.00177	0.409723	-7.32634	2.3653e-13	1.62484e-09
>XM_027962020.1_PREDICTED:_Ovis_aries	hemoglobin_subunit_alpha-1/2	HBA1	mRNA	-3.40715	0.472757	-7.20698	5.72065e-13	3.14384e-09
>XM_015103978.2_PREDICTED:_Ovis_aries	hemoglobin_subunit_alpha-1/2	HBA1	mRNA	-3.41979	0.483569	-7.07199	1.52729e-12	6.99448e-09
>XM_004001979.4_PREDICTED:_Ovis_aries	origin_recognition_complex_subunit_1	ORC1	mRNA	-2.36417	0.349944	-6.75585	1.41997e-11	4.87723e-08
>XM_027980220.1_PREDICTED:_Ovis_aries	SLAM_family_member_9-like	SLAMF9	mRNA	-2.5292	0.375751	-6.73105	1.68442e-11	5.14272e-08
>XM_027963903.1_PREDICTED:_Ovis_aries	hemogen	HEMGN	mRNA	-3.83715	0.62591	-6.13052	8.75948e-10	1.85148e-06
>XM_004009888.4_PREDICTED:_Ovis_aries	joining_chain_of_multimeric_IgA_and_IgM	JCHAIN	mRNA	-2.11731	0.359098	-5.89618	3.72012e-09	6.81477e-06
>XM_015094961.2_PREDICTED:_Ovis_aries	microfibril_associated_protein_5	MFAP5	transcript_variant_X1,_mRNA	-9.26294	1.58344	-5.84987	4.91962e-09	8.44883e-06
>XM_027970325.1_PREDICTED:_Ovis_aries	protocadherin_alpha-C2	PCDHA2	transcript_variant_X2,_mRNA	-2.51019	0.432428	-5.80488	6.44125e-09	1.04113e-05
>XM_027958884.1_PREDICTED:_Ovis_aries	BOLA_class_I_histocompatibility_antigen,_alpha_chain_BL3-7-like	OLA-I	transcript_variant_X7,_mRNA	3.12915	0.543802	5.75421	8.7047e-09	1.32882e-05
>XM_015097512.2_PREDICTED:_Ovis_aries	solute_carrier_family_22_member_1	SLC22A1	transcript_variant_X1,_mRNA	-2.98128	0.520709	-5.72543	1.03175e-08	1.35001e-05
>XM_027975960.1_PREDICTED:_Ovis_aries	hemicentin_1	HMCN1	transcript_variant_X2,_mRNA	4.92857	0.884138	5.57443	2.48342e-08	2.88693e-05
>XM_015094219.2_PREDICTED:_Ovis_aries	ribonucleotide_reductase_regulatory_subunit_M2	RRM2	mRNA	-1.96066	0.354225	-5.53507	3.11099e-08	3.41935e-05
>XM_004010443.4_PREDICTED:_Ovis_aries	BUB1_mitotic_checkpoint_serine/threonine_kinase_B	BUB1B	mRNA	-2.16268	0.391953	-5.5177	3.43466e-08	3.62991e-05
>XM_012177565.3_PREDICTED:_Ovis_aries	secreted_protein_acidic_and_cysteine_rich	SPARC	transcript_variant_X1,_mRNA	-4.3597	0.79711	-5.46938	4.51621e-08	4.59616e-05
>NM_001009224.1_Ovis_aries	secreted_phosphoprotein_1	SPP1	mRNA	-4.31902	0.790724	-5.4621	4.70524e-08	4.61752e-05
>XM_027972160.1_PREDICTED:_Ovis_aries	immunoglobulin_superfamily_DCC_subclass_member_3	IGDCC3	mRNA	5.1077	0.952819	5.36062	8.29357e-08	7.59635e-05
>XM_027957551.1_PREDICTED:_Ovis_aries	fragile_histidine_triad	FHIT	transcript_variant_X3,_mRNA	4.55696	0.861109	5.29197	1.21005e-07	0.000103905
>XM_004009585.4_PREDICTED:_Ovis_aries	mitotic_arrest_deficient_2_like_1	MAD2L1	mRNA	-1.94451	0.368293	-5.2798	1.29326e-07	0.000104518
>XM_027958761.1_PREDICTED:_Ovis_aries	MHC_class_I_polypeptide-related_sequence_B	MICB	transcript_variant_X3,_mRNA	7.50271	1.42048	5.28181	1.27916e-07	0.000104518
>XM_027958760.1_PREDICTED:_Ovis_aries	MHC_class_I_polypeptide-related_sequence_B	MICB	transcript_variant_X2,_mRNA	7.49764	1.42499	5.26155	1.42843e-07	0.000112144
>XM_004018943.4_PREDICTED:_Ovis_aries	lymphocyte_antigen_6_family_member_G6C	LY6G6C	mRNA	3.76796	0.721358	5.22342	1.75645e-07	0.000130442
>XM_012159321.3_PREDICTED:_Ovis_aries	decorin	DCN	transcript_variant_X1,_mRNA	-6.76151	1.29858	-5.20684	1.92084e-07	0.000138897
>XR_003586699.1_PREDICTED:_Ovis_aries	PRELI_domain_containing_3A	PRELID3A	transcript_variant_X3,_misc_RNA	2.70485	0.521343	5.18824	2.12295e-07	0.000145836
>XM_027967912.1_PREDICTED:_Ovis_aries	killer_cell_lectin-like_receptor_subfamily_B_member_1	KLRB1	mRNA	7.74306	1.49203	5.18961	2.1074e-07	0.000145836
>XM_027958880.1_PREDICTED:_Ovis_aries	BOLA_class_I_histocompatibility_antigen,_alpha_chain_BL3-7-like	OLA-I	transcript_variant_X2,_mRNA	3.32404	0.642027	5.17741	2.24988e-07	0.000150786
>XM_042255849.1_PREDICTED:_Ovis_aries	ABI_family_member_3	ABI3	mRNA	-3.48734	0.678016	-5.14344	2.69749e-07	0.00017648
>XM_027970780.1_PREDICTED:_Ovis_aries	cyclin_A2	CCNA2	mRNA	-2.12998	0.420218	-5.06874	4.0045e-07	0.000250081
>XM_004020464.4_PREDICTED:_Ovis_aries	histamine_receptor_H4	HRH4	mRNA	-1.6252	0.322693	-5.03637	4.74446e-07	0.000283409
>XM_004012140.4_PREDICTED:_Ovis_aries	mesenteric_estrogen_dependent_adipogenesis	MEDAG	mRNA	-7.34227	1.45937	-5.03114	4.87575e-07	0.000283441
>XR_001024822.3_PREDICTED:_Ovis_aries	uncharacterized_LOC105605187	LOC105605187	ncRNA	-3.21188	0.638775	-5.02819	4.95129e-07	0.000283441
>XM_004019011.3_PREDICTED:_Ovis_aries	ubiquitin_D-like	UBD	mRNA	-1.91519	0.382439	-5.00782	5.50505e-07	0.000308709
>XM_027966579.1_PREDICTED:_Ovis_aries	dystrobrevin_beta	DTNB	transcript_variant_X14,_mRNA	-2.94952	0.590417	-4.99564	5.86398e-07	0.000322261
>XM_015097914.2_PREDICTED:_Ovis_aries	syndecan_2	SDC2	transcript_variant_X1,_mRNA	-8.34801	1.67816	-4.97451	6.54139e-07	0.00035244
>XM_004022048.4_PREDICTED:_Ovis_aries	5'-aminolevulinate_synthase_2	ALAS2	transcript_variant_X1,_mRNA	-3.0165	0.608295	-4.95894	7.08797e-07	0.000374545
>XM_012096677.3_PREDICTED:_Ovis_aries	growth_hormone_receptor	GHR	transcript_variant_X3,_mRNA	-1.79943	0.372875	-4.82582	1.39426e-06	0.000684135
>XM_004010655.4_PREDICTED:_Ovis_aries	cyclin_dependent_kinase_inhibitor_3	CDKN3	transcript_variant_X1,_mRNA	-2.50823	0.520175	-4.82191	1.42191e-06	0.00068546
>XM_027961960.1_PREDICTED:_Ovis_aries	SEC14_like_lipid_binding_5	SEC14L5	mRNA	1.75172	0.365463	4.79315	1.64183e-06	0.000764649
>XM_027969364.1_PREDICTED:_Ovis_aries	SURP_and_G-patch_domain_containing_2	SUGP2	transcript_variant_X2,_mRNA	2.77755	0.579212	4.7954	1.62354e-06	0.000764649
>XM_012189203.3_PREDICTED:_Ovis_aries	endogenous_retrovirus_group_K_member_5_Gag_polyprotein	LOC105616742	transcript_variant_X2,_mRNA	1.95396	0.41141	4.74942	2.04003e-06	0.000889777
>XM_027958907.1_PREDICTED:_Ovis_aries	BOLA_class_I_histocompatibility_antigen,_alpha_chain_BL3-7-like	OLA-I	mRNA	3.51567	0.739813	4.7521	2.01314e-06	0.000889777
>XM_027977987.1_PREDICTED:_Ovis_aries	leukocyte_immunoglobulin-like_receptor_subfamily_A_member_6	LILRA6	mRNA	-1.72265	0.364546	-4.72546	2.29597e-06	0.00098227
>XM_012180703.3_PREDICTED:_Ovis_aries	homer_scaffold_protein_1	HOMER1	transcript_variant_X1,_mRNA	-2.96522	0.643142	-4.61053	4.01651e-06	0.00162303
>XM_027979083.1_PREDICTED:_Ovis_aries	proteoglycan_3-like	PRG3	mRNA	-4.64232	1.00963	-4.59802	4.26523e-06	0.00169855
>XM_012189202.3_PREDICTED:_Ovis_aries	endogenous_retrovirus_group_K_member_5_Gag_polyprotein	LOC105616742	transcript_variant_X1,_mRNA	1.92188	0.419219	4.58443	4.55237e-06	0.001787
>XM_004002490.4_PREDICTED:_Ovis_aries	selenium_binding_protein_1	SELENBP1	mRNA	2.51297	0.550393	4.56577	4.97661e-06	0.00192602
>XM_027968979.1_PREDICTED:_Ovis_aries	GTPase_IMAP_family_member_8-like	GIMAP8	mRNA	-2.83577	0.623859	-4.54553	5.47979e-06	0.00206467
>XM_004010425.4_PREDICTED:_Ovis_aries	Rho_GTPase_activating_protein_11A	ARHGAP11A	mRNA	-1.54967	0.340938	-4.54532	5.48514e-06	0.00206467
>NM_001009191.1_Ovis_aries	C-X-C_motif_chemokine_ligand_10	CXCL10	mRNA	-2.03588	0.448539	-4.53891	5.65468e-06	0.00208306
>XR_003587310.1_PREDICTED:_Ovis_aries	uncharacterized_LOC114111235	LOC114111235	ncRNA	2.27174	0.500631	4.53776	5.68563e-06	0.00208306
>XM_004016991.3_PREDICTED:_Ovis_aries	granzyme_A	GZMA	mRNA	-2.64191	0.583196	-4.53005	5.89692e-06	0.00211806
>XM_015103798.2_PREDICTED:_Ovis_aries	SEC11_homolog_C,_signal_peptidase_complex_subunit	SEC11C	mRNA	-2.06273	0.455482	-4.52868	5.93533e-06	0.00211806
>XM_027960716.1_PREDICTED:_Ovis_aries	GATA_binding_protein_6	GATA6	mRNA	-3.00238	0.664069	-4.52119	6.1494e-06	0.00216632
>XM_004016355.4_PREDICTED:_Ovis_aries	coiled-coil_domain_containing_34	CCDC34	mRNA	-2.3028	0.510027	-4.51505	6.33031e-06	0.00220182
>XM_027957211.1_PREDICTED:_Ovis_aries	granzyme_H-like	GZMH	transcript_variant_X3,_mRNA	-2.89269	0.643036	-4.49849	6.84366e-06	0.00232463
>XM_027975485.1_PREDICTED:_Ovis_aries	galectin-9-like	LGALS9C	mRNA	-2.48044	0.551427	-4.49822	6.85258e-06	0.00232463
>XR_001040161.3_PREDICTED:_Ovis_aries	GTPase_IMAP_family_member_7-like	GIMAP7	misc_RNA	-1.50395	0.335252	-4.48602	7.25644e-06	0.00243162
>XM_012174925.2_PREDICTED:_Ovis_aries	heat_shock_protein_90_beta_family_member_1	HSP90B1	mRNA	-1.72709	0.385706	-4.47775	7.54343e-06	0.00249733
>XM_027959133.1_PREDICTED:_Ovis_aries	zinc_finger_protein_318	ZNF318	mRNA	1.56326	0.349603	4.47152	7.76667e-06	0.00254063
>XM_027959951.1_PREDICTED:_Ovis_aries	protein-glucosylgalactosylhydroxylysine_glucosidase	PGGHG	transcript_variant_X1,_mRNA	4.64357	1.05332	4.4085	1.04087e-05	0.00325011
>XM_004019321.4_PREDICTED:_Ovis_aries	butyrophilin_subfamily_2_member_A2	BTN2A2	mRNA	3.36967	0.765417	4.4024	1.07061e-05	0.0033054
>XM_027971400.1_PREDICTED:_Ovis_aries	rho_GTPase-activating_protein_20-like	ARHGAP20	mRNA	-3.85051	0.879542	-4.37786	1.1985e-05	0.00351626
>NM_001161379.1_Ovis_aries	apolipoprotein_B_mRNA_editing_enzyme,_catalytic_polypeptide-like	APOBEC3Z1	mRNA	-3.5536	0.812721	-4.37247	1.22848e-05	0.00351626
>XR_003591764.1_PREDICTED:_Ovis_aries	uncharacterized_LOC114118398	LOC114118398	ncRNA	-2.52818	0.577247	-4.37971	1.18837e-05	0.00351626
>XM_012098751.3_PREDICTED:_Ovis_aries	zinc_finger_matrin-type_3	ZMAT3	transcript_variant_X3,_mRNA	1.56755	0.357916	4.37967	1.1886e-05	0.00351626
>XM_027958878.1_PREDICTED:_Ovis_aries	alpha_tubulin_acetyltransferase_1	ATAT1	transcript_variant_X6,_mRNA	1.91548	0.438057	4.37268	1.22729e-05	0.00351626
>XM_027957209.1_PREDICTED:_Ovis_aries	granzyme_H-like	GZMH	transcript_variant_X1,_mRNA	-3.2683	0.748873	-4.36429	1.27537e-05	0.00361284
>XM_004002734.4_PREDICTED:_Ovis_aries	myelin_protein_zero_like_1	MPZL1	transcript_variant_X2,_mRNA	2.13283	0.49117	4.34235	1.40968e-05	0.00391264
>XM_015094962.2_PREDICTED:_Ovis_aries	microfibril_associated_protein_5	MFAP5	transcript_variant_X2,_mRNA	-6.10705	1.41106	-4.32798	1.50481e-05	0.00406114
>XR_003590278.1_PREDICTED:_Ovis_aries	uncharacterized_LOC114116349	LOC114116349	ncRNA	1.52896	0.353089	4.33026	1.48935e-05	0.00406114
>XM_015101061.2_PREDICTED:_Ovis_aries	post-GPI_attachment_to_proteins_2	PGAP2	transcript_variant_X3,_mRNA	2.60186	0.601764	4.32371	1.53426e-05	0.00409305
>XM_027966337.1_PREDICTED:_Ovis_aries	kynurenine--oxoglutarate_transaminase_1	KYAT1	transcript_variant_X2,_mRNA	3.76363	0.871426	4.31893	1.56788e-05	0.00414251
>XM_015099469.2_PREDICTED:_Ovis_aries	tyrosine-protein_phosphatase_non-receptor_type_substrate_1-like	PTPN1	mRNA	3.5923	0.832456	4.3153	1.59386e-05	0.00417105
>XM_012161602.2_PREDICTED:_Ovis_aries	kynurenine--oxoglutarate_transaminase_1	KYAT1	transcript_variant_X5,_mRNA	1.83384	0.425291	4.31197	1.61808e-05	0.00418067
>XM_027973251.1_PREDICTED:_Ovis_aries	carbonic_anhydrase_2	CA2	mRNA	-2.06191	0.481958	-4.27819	1.88415e-05	0.00469007
>XM_012096676.2_PREDICTED:_Ovis_aries	growth_hormone_receptor	GHR	transcript_variant_X1,_mRNA	-1.70152	0.397834	-4.27696	1.8946e-05	0.00469007
>XM_027960688.1_PREDICTED:_Ovis_aries	kelch_like_family_member_14	KLHL14	mRNA	2.50817	0.58729	4.27075	1.9482e-05	0.00473739
>XM_015098972.2_PREDICTED:_Ovis_aries	G_protein-coupled_receptor_class_C_group_5_member_C	GPRC5C	mRNA	2.94637	0.691228	4.26252	2.02136e-05	0.00482091
>XM_004004249.4_PREDICTED:_Ovis_aries	paired_box_5	PAX5	mRNA	2.41627	0.568356	4.25133	2.12502e-05	0.00499071
>XR_003586035.1_PREDICTED:_Ovis_aries	exo/endonuclease_G	EXOG	transcript_variant_X5,_misc_RNA	1.70963	0.404294	4.22867	2.35074e-05	0.00547403
>XM_012105586.3_PREDICTED:_Ovis_aries	angiotensinogen	AGT	mRNA	-2.10507	0.499731	-4.21241	2.52659e-05	0.00578549
>XM_012106988.2_PREDICTED:_Ovis_aries	high_mobility_group_nucleosome_binding_domain_5	HMGN5	partial_mRNA	-2.16645	0.514747	-4.20877	2.56761e-05	0.00583081
>XM_004008108.4_PREDICTED:_Ovis_aries	RAB19,_member_RAS_oncogene_family	RAB19	mRNA	-1.67018	0.398106	-4.1953	2.72506e-05	0.00613764
>XM_027962403.1_PREDICTED:_Ovis_aries	cadherin_related_23	CDH23	transcript_variant_X2,_mRNA	1.80014	0.432297	4.16413	3.12547e-05	0.00687054
>XM_015100422.2_PREDICTED:_Ovis_aries	SHC_binding_and_spindle_associated_1	SHCBP1	mRNA	-1.88868	0.453954	-4.16051	3.17536e-05	0.00687669
>NM_001306124.1_Ovis_aries	bactericidal_permeability_increasing_protein	BPI	mRNA	-1.6666	0.40077	-4.15851	3.20335e-05	0.00687669
>XM_027960305.1_PREDICTED:_Ovis_aries	dual_specificity_phosphatase_5	DUSP5	mRNA	-2.00937	0.483649	-4.1546	3.25857e-05	0.006941
>XM_027961939.1_PREDICTED:_Ovis_aries	essential_meiotic_structure-specific_endonuclease_subunit_2	EME2	mRNA	3.19635	0.769985	4.15118	3.30762e-05	0.00699128
>XM_012180181.3_PREDICTED:_Ovis_aries	N-acylethanolamine_acid_amidase	NAAA	transcript_variant_X1,_mRNA	-2.30994	0.557842	-4.14085	3.46019e-05	0.00725794
>XR_003585710.1_PREDICTED:_Ovis_aries	uncharacterized_LOC114109014	LOC114109014	transcript_variant_X1,_ncRNA	2.78298	0.673559	4.13175	3.6001e-05	0.00749421
>XM_015095764.2_PREDICTED:_Ovis_aries	family_with_sequence_similarity_129_member_C	FAM129C	mRNA	3.30386	0.80048	4.12735	3.66975e-05	0.00758175
>XM_012095668.2_PREDICTED:_Ovis_aries	nucleobindin_2	NUCB2	mRNA	-1.82295	0.44392	-4.10648	4.01743e-05	0.0081771
>XR_003591216.1_PREDICTED:_Ovis_aries	aldo-keto_reductase_family_1_member_E2	AKR1E2	transcript_variant_X11,_misc_RNA	2.7716	0.67652	4.09685	4.18813e-05	0.00846186
>XM_027976099.1_PREDICTED:_Ovis_aries	chromosome_12_C1orf53_homolog	C12H1orf53	partial_mRNA	-2.39427	0.58647	-4.08251	4.45523e-05	0.00880725
>XR_003591215.1_PREDICTED:_Ovis_aries	aldo-keto_reductase_family_1_member_E2	AKR1E2	transcript_variant_X7,_misc_RNA	2.79103	0.684091	4.07991	4.50523e-05	0.00884248
>XM_027971848.1_PREDICTED:_Ovis_aries	deoxyuridine_triphosphatase	DUT	transcript_variant_X1,_mRNA	-1.78269	0.437288	-4.07671	4.56782e-05	0.00890174
>XM_004013374.4_PREDICTED:_Ovis_aries	SH3_and_cysteine_rich_domain_2	STAC2	transcript_variant_X2,_mRNA	1.59131	0.391267	4.06708	4.76064e-05	0.00897868
>XR_003591276.1_PREDICTED:_Ovis_aries	transglutaminase_2	TGM2	transcript_variant_X2,_misc_RNA	1.91398	0.47066	4.06659	4.77068e-05	0.00897868
>XR_003586033.1_PREDICTED:_Ovis_aries	exo/endonuclease_G	EXOG	transcript_variant_X3,_misc_RNA	1.53588	0.379175	4.05058	5.10912e-05	0.0094857
>NM_001082594.1_Ovis_aries	interleukin_13	IL13	mRNA	-4.03928	0.998657	-4.04471	5.23878e-05	0.0095332
>XM_027966119.1_PREDICTED:_Ovis_aries	ADAM_metallopeptidase_with_thrombospondin_type_1_motif_13	ADAMTS13	mRNA	4.39335	1.08823	4.03714	5.41063e-05	0.00971721
>XM_027978118.1_PREDICTED:_Ovis_aries	cadherin_1	CDH1	mRNA	-2.37764	0.590308	-4.0278	5.63021e-05	0.00998108
>XM_027974401.1_PREDICTED:_Ovis_aries	HEXIM_P-TEFb_complex_subunit_2	HEXIM2	transcript_variant_X4,_mRNA	1.88896	0.47136	4.00747	6.13722e-05	0.0106062
>XM_012181675.3_PREDICTED:_Ovis_aries	cyclin_dependent_kinase_inhibitor_3	CDKN3	transcript_variant_X2,_mRNA	-2.51058	0.627881	-3.99849	6.37467e-05	0.0109477
>XM_004013903.4_PREDICTED:_Ovis_aries	denticleless_E3_ubiquitin_protein_ligase_homolog	DTL	mRNA	-1.81558	0.45447	-3.99494	6.47114e-05	0.0110443
>XM_015096854.2_PREDICTED:_Ovis_aries	REC114_meiotic_recombination_protein	REC114	mRNA	-2.35694	0.590878	-3.98887	6.63885e-05	0.0112606
>XM_027973193.1_PREDICTED:_Ovis_aries	lysosomal_protein_transmembrane_4_beta	LAPTM4B	transcript_variant_X2,_mRNA	-1.83989	0.46157	-3.98616	6.71503e-05	0.01132
>XM_027974706.1_PREDICTED:_Ovis_aries	collagen_type_I_alpha_1_chain	COL1A1	transcript_variant_X2,_mRNA	-3.37857	0.850788	-3.97111	7.15386e-05	0.0119862
>XM_027971850.1_PREDICTED:_Ovis_aries	deoxyuridine_triphosphatase	DUT	transcript_variant_X3,_mRNA	-1.84024	0.463628	-3.96921	7.21127e-05	0.0120092
>XM_012187922.3_PREDICTED:_Ovis_aries	mitochondrial_amidoxime_reducing_component_2	MARC2	mRNA	-1.91809	0.483463	-3.96741	7.26587e-05	0.0120272
>XM_027957212.1_PREDICTED:_Ovis_aries	granzyme_H-like	GZMH	transcript_variant_X4,_mRNA	-2.79908	0.706739	-3.96055	7.4776e-05	0.0123036
>XM_004012860.4_PREDICTED:_Ovis_aries	cell_division_cycle_6	CDC6	transcript_variant_X1,_mRNA	-1.79077	0.453128	-3.95201	7.74977e-05	0.0126755
>XM_027957555.1_PREDICTED:_Ovis_aries	peroxisome_proliferator_activated_receptor_gamma	PPARG	transcript_variant_X3,_mRNA	-2.54086	0.643494	-3.94854	7.86278e-05	0.0127602
>XM_004013588.4_PREDICTED:_Ovis_aries	regulator_of_G_protein_signaling_1	RGS1	mRNA	-1.91834	0.485953	-3.94758	7.89442e-05	0.0127602
>XR_003589247.1_PREDICTED:_Ovis_aries	uncharacterized_LOC114114614	LOC114114614	ncRNA	4.02229	1.02551	3.92222	8.77367e-05	0.0139354
>XM_004012861.4_PREDICTED:_Ovis_aries	cell_division_cycle_6	CDC6	transcript_variant_X2,_mRNA	-2.32919	0.595143	-3.91367	9.09051e-05	0.0142576
>XM_027963387.1_PREDICTED:_Ovis_aries	cyclin_dependent_kinase_16	CDK16	transcript_variant_X2,_mRNA	1.63602	0.418145	3.91256	9.13218e-05	0.0142576
>XM_027961705.1_PREDICTED:_Ovis_aries	SH2B_adaptor_protein_2	SH2B2	transcript_variant_X4,_mRNA	2.55947	0.654635	3.90976	9.23861e-05	0.0142617
>XR_003586036.1_PREDICTED:_Ovis_aries	exo/endonuclease_G	EXOG	transcript_variant_X6,_misc_RNA	1.63599	0.420678	3.88893	0.000100686	0.0152853
>XR_003585980.1_PREDICTED:_Ovis_aries	kelch_like_family_member_18	KLHL18	transcript_variant_X7,_ncRNA	6.61881	1.70409	3.88408	0.000102719	0.0153398
>XM_004018229.3_PREDICTED:_Ovis_aries	exo/endonuclease_G	EXOG	transcript_variant_X2,_mRNA	1.66074	0.427983	3.8804	0.000104285	0.0154061
>XR_003585815.1_PREDICTED:_Ovis_aries	ferritin_light_chain_pseudogene	LOC114109119	misc_RNA	2.07019	0.537587	3.8509	0.000117684	0.0172007
>NM_001166198.1_Ovis_aries	four_and_a_half_LIM_domains_1	FHL1	mRNA	2.23235	0.580003	3.84885	0.000118674	0.0172535
>XM_004018516.4_PREDICTED:_Ovis_aries	C-X-C_motif_chemokine_receptor_6	CXCR6	mRNA	-2.14889	0.558848	-3.84522	0.000120444	0.0173677
>XM_027958152.1_PREDICTED:_Ovis_aries	solute_carrier_family_22_member_13	SLC22A13	mRNA	2.30051	0.598367	3.84465	0.000120723	0.0173677
>XR_003586688.1_PREDICTED:_Ovis_aries	uncharacterized_LOC114110434	LOC114110434	ncRNA	3.40427	0.885936	3.84257	0.000121752	0.0174244
>XM_004004077.4_PREDICTED:_Ovis_aries	asporin	ASPN	mRNA	-6.71416	1.75627	-3.82296	0.000131859	0.018392
>XM_004008211.4_PREDICTED:_Ovis_aries	twist_family_bHLH_transcription_factor_1	TWIST1	mRNA	-3.13631	0.819899	-3.82524	0.000130647	0.018392
>XM_012178541.3_PREDICTED:_Ovis_aries	kelch_like_family_member_3	KLHL3	transcript_variant_X2,_mRNA	1.56449	0.40948	3.82068	0.000133087	0.0184695
>XM_012178900.3_PREDICTED:_Ovis_aries	hyaluronan_mediated_motility_receptor	HMMR	transcript_variant_X1,_mRNA	-1.8073	0.473247	-3.81893	0.000134033	0.0185074
>XM_027966336.1_PREDICTED:_Ovis_aries	kynurenine--oxoglutarate_transaminase_1	KYAT1	transcript_variant_X1,_mRNA	3.13976	0.822875	3.8156	0.000135853	0.0186649
>XM_004005579.3_PREDICTED:_Ovis_aries	phospholipid_phosphatase_7inactive)	PLPP7	mRNA	2.93334	0.769734	3.81085	0.000138489	0.0189324
>XM_027962298.1_PREDICTED:_Ovis_aries	zinc_finger_CCHC-type_containing_24	ZCCHC24	transcript_variant_X2,_mRNA	2.68818	0.706566	3.80457	0.000142052	0.0192281
>XM_015104414.2_PREDICTED:_Ovis_aries	pterin-4_alpha-carbinolamine_dehydratase_1	PCBD1	mRNA	-1.90981	0.502417	-3.80126	0.000143964	0.0193914
>XR_003586607.1_PREDICTED:_Ovis_aries	uncharacterized_LOC114110310	LOC114110310	ncRNA	1.86837	0.491853	3.79864	0.000145495	0.0194073
>XM_004005653.4_PREDICTED:_Ovis_aries	zinc_finger_and_BTB_domain_containing_26	ZBTB26	transcript_variant_X1,_mRNA	2.07142	0.54521	3.79931	0.000145102	0.0194073
>XM_027978293.1_PREDICTED:_Ovis_aries	MIA_SH3_domain_containing	MIA	transcript_variant_X1,_mRNA	1.87188	0.493382	3.79397	0.000148258	0.019492
>XM_027965690.1_PREDICTED:_Ovis_aries	chloride_voltage-gated_channel_Ka	CLCNKA	transcript_variant_X3,_mRNA	5.3532	1.41282	3.78902	0.00015124	0.0197894
>XM_004002638.4_PREDICTED:_Ovis_aries	CD1e_molecule	CD1E	mRNA	-1.55717	0.411884	-3.78061	0.000156442	0.0203692
>XM_027969363.1_PREDICTED:_Ovis_aries	SURP_and_G-patch_domain_containing_2	SUGP2	transcript_variant_X1,_mRNA	1.51347	0.400637	3.77766	0.000158311	0.0204228
>XR_003589699.1_PREDICTED:_Ovis_aries	N-acylethanolamine_acid_amidase	NAAA	transcript_variant_X2,_misc_RNA	-2.13189	0.56455	-3.77626	0.0001592	0.0204415
>XM_004022049.4_PREDICTED:_Ovis_aries	5'-aminolevulinate_synthase_2	ALAS2	transcript_variant_X2,_mRNA	-2.45782	0.651936	-3.77003	0.000163227	0.0207645
>XM_027969505.1_PREDICTED:_Ovis_aries	adhesion_G_protein-coupled_receptor_L1	ADGRL1	transcript_variant_X6,_mRNA	2.08993	0.554307	3.77034	0.000163026	0.0207645
>XM_027977896.1_PREDICTED:_Ovis_aries	Fc_receptor_like_3	FCRL3	mRNA	1.89873	0.505461	3.75643	0.000172358	0.021725
>XM_015096907.2_PREDICTED:_Ovis_aries	ribonuclease_4	RNASE4	mRNA	-2.09028	0.556866	-3.75365	0.000174278	0.0218196
>XM_012178543.2_PREDICTED:_Ovis_aries	kelch_like_family_member_3	KLHL3	transcript_variant_X3,_mRNA	1.51486	0.404114	3.74861	0.000177818	0.022109
>XM_027968590.1_PREDICTED:_Ovis_aries	laminin_subunit_beta_1	LAMB1	mRNA	-3.13194	0.836793	-3.74278	0.000181992	0.0223994
>XM_004019629.3_PREDICTED:_Ovis_aries	HRAS-like_suppressor_3	LOC101120029	transcript_variant_X1,_mRNA	-1.53475	0.410269	-3.74083	0.000183414	0.0223994
>XM_027971692.1_PREDICTED:_Ovis_aries	chromosome_7_C15orf62_homolog	C7H15orf62	mRNA	2.65224	0.708814	3.7418	0.000182704	0.0223994
>XR_003591972.1_PREDICTED:_Ovis_aries	solute_carrier_family_7_member_11	SLC7A11	transcript_variant_X3,_misc_RNA	-3.2056	0.857295	-3.73921	0.000184603	0.0224448
>XM_012144109.2_PREDICTED:_Ovis_aries	methyltransferase_like_21A	METTL21A	transcript_variant_X5,_mRNA	-1.7463	0.467651	-3.7342	0.000188316	0.0227954
>XM_027957210.1_PREDICTED:_Ovis_aries	granzyme_H-like	GZMH	transcript_variant_X2,_mRNA	-2.47018	0.662581	-3.72811	0.000192919	0.0230172
>XM_027979067.1_PREDICTED:_Ovis_aries	docosahexaenoic_acid_omega-hydroxylase_CYP4F3-like	LOC101118184	transcript_variant_X1,_mRNA	1.50557	0.404044	3.72627	0.000194337	0.0230172
>XM_027979688.1_PREDICTED:_Ovis_aries	diacylglycerol_kinase_zeta	DGKZ	transcript_variant_X10,_mRNA	2.39744	0.643271	3.72695	0.000193807	0.0230172
>XM_027968244.1_PREDICTED:_Ovis_aries	TraB_domain_containing	TRABD	transcript_variant_X1,_mRNA	2.77095	0.743176	3.72852	0.00019261	0.0230172
>XM_027970768.1_PREDICTED:_Ovis_aries	ADP-ribosyl_cyclase/cyclic_ADP-ribose_hydrolase_2-like	LOC114115250	mRNA	3.00345	0.806341	3.72479	0.00019548	0.0230532
>XM_027973622.1_PREDICTED:_Ovis_aries	ubiquitin-40S_ribosomal_protein_S27a	RPS27A	mRNA	-2.81673	0.75831	-3.71448	0.000203622	0.0236081
>XR_003589743.1_PREDICTED:_Ovis_aries	TNFAIP3_ interacting_ protein_ 2	TNIP2	ncRNA	3.08958	0.831577	3.71532	0.000202945	0.0236081
>XM_015101979.2_PREDICTED:_Ovis_aries	mannosidase_alpha_class_2C_member_1	MAN2C1	transcript_variant_X3,_mRNA	3.60398	0.96985	3.71601	0.00020239	0.0236081
>XM_027965575.1_PREDICTED:_Ovis_aries	cytidine_deaminase	CDA	mRNA	1.84014	0.496314	3.70761	0.000209228	0.0239549
>XM_004011902.4_PREDICTED:_Ovis_aries	sphingomyelin_phosphodiesterase_5	SMPD5	mRNA	4.18776	1.12991	3.70628	0.000210323	0.0239803
>XM_027979546.1_PREDICTED:_Ovis_aries	40S_ribosomal_protein_S24-like	LOC101106881	mRNA	-3.05927	0.825915	-3.7041	0.000212144	0.024088
>XM_027974707.1_PREDICTED:_Ovis_aries	collagen_type_I_alpha_1_chain	COL1A1	transcript_variant_X3,_mRNA	-3.38057	0.914124	-3.69815	0.000217176	0.0243574
>XM_004006903.4_PREDICTED:_Ovis_aries	complement_C3a_receptor_1	C3AR1	mRNA	-1.901	0.514944	-3.69167	0.000222788	0.0248853
>XM_027958876.1_PREDICTED:_Ovis_aries	alpha_tubulin_acetyltransferase_1	ATAT1	transcript_variant_X4,_mRNA	1.69242	0.458758	3.68913	0.000225019	0.0250327
>XM_027976144.1_PREDICTED:_Ovis_aries	C4b-binding_protein_alpha_chain-like	C4BPA	mRNA	-2.77194	0.752933	-3.68152	0.000231847	0.0254828
>XM_027972439.1_PREDICTED:_Ovis_aries	serine_and_arginine_rich_splicing_factor_12	SRSF12	transcript_variant_X1,_mRNA	-2.07418	0.56339	-3.68161	0.000231766	0.0254828
>XR_003586263.1_PREDICTED:_Ovis_aries	uncharacterized_LOC114109649	LOC114109649	transcript_variant_X2,_ncRNA	5.65513	1.53589	3.68199	0.000231421	0.0254828
>XM_027965866.1_PREDICTED:_Ovis_aries	TNF_receptor_superfamily_member_13C	TNFRSF13C	mRNA	2.57868	0.701258	3.67722	0.000235788	0.0256086
>XM_027966513.1_PREDICTED:_Ovis_aries	grainyhead_like_transcription_factor_1	GRHL1	transcript_variant_X2,_mRNA	-2.81364	0.765455	-3.67578	0.000237122	0.0256521
>XR_003590352.1_PREDICTED:_Ovis_aries	aarF_domain_containing_kinase_5	ADCK5	transcript_variant_X4,_misc_RNA	2.56602	0.701196	3.65949	0.000252713	0.0269149
>XR_003585997.1_PREDICTED:_Ovis_aries	XPC_complex_subunit,_DNA_damage_recognition_and_repair_factor	XPC	transcript_variant_X6,_misc_RNA	1.766	0.482909	3.657	0.000255183	0.0270163
>XR_003588224.1_PREDICTED:_Ovis_aries	nuclear_ receptor_ subfamily_ 4_ group_ A_ member_ 2	NR4A2	ncRNA	1.71959	0.471765	3.64502	0.000267371	0.0281044
>XM_027961378.1_PREDICTED:_Ovis_aries	calpain_15	CAPN15	transcript_variant_X3,_mRNA	3.01252	0.826984	3.64278	0.000269714	0.0281794
>XM_015096076.2_PREDICTED:_Ovis_aries	protocadherin_alpha-C2	PCDHA2	transcript_variant_X3,_mRNA	-1.65583	0.456223	-3.62944	0.000284037	0.029014
>XM_027974338.1_PREDICTED:_Ovis_aries	sodium_voltage-gated_channel_alpha_subunit_4	SCN4A	mRNA	3.29768	0.909277	3.62671	0.000287059	0.0292141
>XM_027959100.1_PREDICTED:_Ovis_aries	cullin_9	CUL9	mRNA	1.85203	0.511301	3.62219	0.000292121	0.0295106
>XM_004010210.4_PREDICTED:_Ovis_aries	homer_scaffold_protein_1	HOMER1	transcript_variant_X2,_mRNA	-2.29078	0.632872	-3.61966	0.000294995	0.0296919
>XR_003591754.1_PREDICTED:_Ovis_aries	layilin	LAYN	transcript_variant_X6,_misc_RNA	1.85416	0.512485	3.61799	0.000296901	0.0297746
>XM_027965785.1_PREDICTED:_Ovis_aries	glycine_cleavage_system_H_protein,_mitochondrial	LOC114113596	mRNA	-2.55838	0.707684	-3.61514	0.000300183	0.0299942
>XM_027972552.1_PREDICTED:_Ovis_aries	UL16-binding_protein_1-like	ULBP1	mRNA	1.63523	0.452896	3.61061	0.000305484	0.0303035
>XM_027975134.1_PREDICTED:_Ovis_aries	small_G_protein_signaling_modulator_2	SGSM2	transcript_variant_X3,_mRNA	2.70819	0.750015	3.61084	0.000305203	0.0303035
>XR_003586034.1_PREDICTED:_Ovis_aries	exo/endonuclease_G	EXOG	transcript_variant_X4,_misc_RNA	1.52395	0.422859	3.60393	0.000313442	0.0308154
>XM_015102662.2_PREDICTED:_Ovis_aries	protein_kinase_C_and_casein_kinase_substrate_in_neurons_1	PACSIN1	mRNA	1.83664	0.510307	3.59908	0.000319339	0.0311163
>XM_027974705.1_PREDICTED:_Ovis_aries	collagen_type_I_alpha_1_chain	COL1A1	transcript_variant_X1,_mRNA	-3.11717	0.867234	-3.59438	0.000325169	0.0313508
>XM_004014999.3_PREDICTED:_Ovis_aries	metallothionein-2	MT2A	mRNA	-2.17151	0.604303	-3.59341	0.000326376	0.0313572
>XR_003588053.1_PREDICTED:_Ovis_aries	uncharacterized_LOC105606607	LOC105606607	ncRNA	3.60409	1.00345	3.5917	0.00032853	0.0314316
>XM_027974921.1_PREDICTED:_Ovis_aries	phosphoribosylformylglycinamidine_synthase	PFAS	transcript_variant_X1,_mRNA	4.09481	1.14094	3.58896	0.000331997	0.0315661
>XM_012184105.2_PREDICTED:_Ovis_aries	cyclin_E2	CCNE2	transcript_variant_X1,_mRNA	-2.08428	0.581556	-3.58397	0.00033841	0.0319543
>XM_027964615.1_PREDICTED:_Ovis_aries	BLK_proto-oncogene,_Src_family_tyrosine_kinase	BLK	mRNA	2.26115	0.631064	3.58308	0.000339568	0.0319543
>XM_012175429.3_PREDICTED:_Ovis_aries	C-type_lectin-like_domain_family_1	CLECL1	transcript_variant_X2,_mRNA	-1.79496	0.501105	-3.58201	0.000340955	0.0319601
>XM_004013098.3_PREDICTED:_Ovis_aries	baculoviral_IAP_repeat_containing_5	BIRC5	transcript_variant_X1,_mRNA	-1.63422	0.456326	-3.58125	0.000341956	0.0319601
>XM_027968157.1_PREDICTED:_Ovis_aries	shisa_family_member_8	SHISA8	mRNA	2.42588	0.67908	3.57231	0.000353852	0.0328485
>XM_027977392.1_PREDICTED:_Ovis_aries	GRAM_domain_containing_1A	GRAMD1A	transcript_variant_X5,_mRNA	1.58386	0.443547	3.5709	0.000355756	0.032914
>XM_027972434.1_PREDICTED:_Ovis_aries	POU_class_3_homeobox_2	POU3F2	mRNA	-4.86168	1.36391	-3.56453	0.000364513	0.0333333
>XM_027967016.1_PREDICTED:_Ovis_aries	bolA_family_member_3	BOLA3	mRNA	-1.64065	0.460331	-3.56408	0.00036514	0.0333333
>XM_027969366.1_PREDICTED:_Ovis_aries	SURP_and_G-patch_domain_containing_2	SUGP2	transcript_variant_X5,_mRNA	1.63053	0.45724	3.56603	0.000362426	0.0333333
>XM_027965677.1_PREDICTED:_Ovis_aries	ciliogenesis_and_planar_polarity_effector_2	CPLANE2	mRNA	2.20591	0.61925	3.56224	0.00036771	0.0333962
>XM_027980275.1_PREDICTED:_Ovis_aries	chromosome_17_C22orf15_homolog	C17H22orf15	mRNA	3.7154	1.04311	3.56184	0.00036826	0.0333962
>XM_027969025.1_PREDICTED:_Ovis_aries	chondroitin_polymerizing_factor_2	CHPF2	mRNA	2.96037	0.83318	3.5531	0.000380718	0.0341875
>XM_012176841.3_PREDICTED:_Ovis_aries	FKBP_prolyl_isomerase_9	FKBP9	mRNA	-2.47214	0.696699	-3.54836	0.000387639	0.0346956
>XM_027958905.1_PREDICTED:_Ovis_aries	BOLA_class_I_histocompatibility_antigen,_alpha_chain_BL3-6	OVAR	mRNA	1.70018	0.480541	3.53805	0.000403099	0.0358458
>XM_027961748.1_PREDICTED:_Ovis_aries	SH2B_adaptor_protein_1	SH2B1	transcript_variant_X4,_mRNA	2.56571	0.726293	3.53261	0.000411474	0.0362387
>XM_027975043.1_PREDICTED:_Ovis_aries	proline,_glutamate_and_leucine_rich_protein_1	PELP1	transcript_variant_X4,_mRNA	2.95377	0.838663	3.52201	0.000428295	0.0374799
>XM_027960471.1_PREDICTED:_Ovis_aries	nuclear_factor_kappa_B_subunit_2	NFKB2	transcript_variant_X2,_mRNA	2.79143	0.793088	3.5197	0.000432031	0.0376868
>XM_027969760.1_PREDICTED:_Ovis_aries	ADAM_metallopeptidase_with_thrombospondin_type_1_motif_10	ADAMTS10	mRNA	2.45102	0.697187	3.51558	0.000438794	0.0380353
>XM_027973505.1_PREDICTED:_Ovis_aries	diaphanous_related_formin_3	DIAPH3	mRNA	-2.16777	0.617305	-3.51167	0.000445304	0.0384782
>XM_027960010.1_PREDICTED:_Ovis_aries	interferon-induced_transmembrane_protein_1-like	IFITM1	transcript_variant_X1,_mRNA	2.09218	0.595941	3.51072	0.000446899	0.038495
>XM_027980005.1_PREDICTED:_Ovis_aries	ectodermal-neural_cortex_1	ENC1	mRNA	-1.79194	0.510585	-3.50958	0.000448816	0.0385393
>XM_027961745.1_PREDICTED:_Ovis_aries	SH2B_adaptor_protein_1	SH2B1	transcript_variant_X2,_mRNA	2.50506	0.714302	3.507	0.000453189	0.0386731
>XM_027968974.1_PREDICTED:_Ovis_aries	oocyte_zinc_finger_protein_XlCOF26-like	LOC105610309	transcript_variant_X1,_mRNA	3.11619	0.891114	3.49696	0.000470595	0.0399105
>XM_027976879.1_PREDICTED:_Ovis_aries	PC-esterase_domain-containing_protein_1A	PCED1A	mRNA	2.65266	0.76013	3.48975	0.00048347	0.0407509
>XM_027969797.1_PREDICTED:_Ovis_aries	TraB_domain_containing_2B	TRABD2B	mRNA	3.50628	1.00586	3.48586	0.000490557	0.0410961
>XM_004009717.4_PREDICTED:_Ovis_aries	integrin_binding_sialoprotein	IBSP	mRNA	-2.61282	0.750569	-3.48112	0.000499327	0.041365
>XM_027969482.1_PREDICTED:_Ovis_aries	adhesion_G_protein-coupled_receptor_E3	ADGRE3	mRNA	-1.769	0.508012	-3.48219	0.000497323	0.041365
>XM_027967595.1_PREDICTED:_Ovis_aries	ankyrin_repeat_domain_52	ANKRD52	transcript_variant_X3,_mRNA	2.60674	0.748963	3.48046	0.000500548	0.041365
>XM_027966136.1_PREDICTED:_Ovis_aries	solute_carrier_family_2_member_6	SLC2A6	transcript_variant_X3,_mRNA	2.69818	0.775325	3.48006	0.000501294	0.041365
>XM_004013958.4_PREDICTED:_Ovis_aries	regulator_of_hemoglobinization_and_erythroid_cell_expansion	RHEX	mRNA	-1.97334	0.567408	-3.47782	0.000505508	0.0415879
>XR_003586241.1_PREDICTED:_Ovis_aries	BOLA_class_I_histocompatibility_antigen,_alpha_chain_BL3-7-like	OLA-I	transcript_variant_X2,_misc_RNA	2.19089	0.630909	3.47258	0.000515472	0.0421314
>XM_027970199.1_PREDICTED:_Ovis_aries	APC_regulator_of_WNT_signaling_pathway_2	APC2	transcript_variant_X2,_mRNA	3.41384	0.983267	3.47194	0.000516714	0.0421314
>XM_027959463.1_PREDICTED:_Ovis_aries	fatty_acid_desaturase_3	FADS3	transcript_variant_X1,_mRNA	2.29587	0.661714	3.46958	0.000521266	0.0423768
>XM_015094251.2_PREDICTED:_Ovis_aries	peptidyl-tRNA_hydrolase_domain_containing_1	PTRHD1	mRNA	-1.55487	0.448461	-3.46714	0.000526037	0.0424306
>XM_015100482.2_PREDICTED:_Ovis_aries	solute_carrier_family_9_member_A5	SLC9A5	mRNA	2.89496	0.835035	3.46687	0.000526561	0.0424306
>XM_004003175.4_PREDICTED:_Ovis_aries	SEC62_homolog,_preprotein_translocation_factor	SEC62	mRNA	-1.62952	0.470171	-3.4658	0.00052865	0.0424744
>XM_027974991.1_PREDICTED:_Ovis_aries	neuralized_E3_ubiquitin_protein_ligase_4	NEURL4	transcript_variant_X1,_mRNA	2.20473	0.63691	3.4616	0.000536981	0.0428768
>NM_001009254.1_Ovis_aries	stearoyl-CoA_desaturase	SCD	mRNA	1.69773	0.490664	3.46007	0.000540027	0.0428869
>NM_001009411.2_Ovis_aries	mast_cell_proteinase-3	MCP-3	mRNA	2.13096	0.616313	3.4576	0.000545013	0.0431581
>XM_004020830.3_PREDICTED:_Ovis_aries	cytochrome_b-c1_complex_subunit_2,_mitochondrial	UQCRC2	mRNA	-1.56966	0.454132	-3.45641	0.000547432	0.0432251
>XM_027957709.1_PREDICTED:_Ovis_aries	protein_tyrosine_phosphatase,_non-receptor_type_23	PTPN23	transcript_variant_X1,_mRNA	2.13474	0.618156	3.45341	0.000553556	0.0435449
>XM_027968291.1_PREDICTED:_Ovis_aries	SH3_and_multiple_ankyrin_repeat_domains_3	SHANK3	mRNA	2.35474	0.683136	3.44696	0.000566932	0.0441543
>XM_027972817.1_PREDICTED:_Ovis_aries	jerky_protein_homolog	JRK	mRNA	3.82472	1.10964	3.44682	0.000567234	0.0441543
>XM_027963121.1_PREDICTED:_Ovis_aries	high_mobility_group_box_3	HMGB3	mRNA	-1.91183	0.555258	-3.44313	0.000575022	0.0445072
>XM_027957710.1_PREDICTED:_Ovis_aries	protein_tyrosine_phosphatase,_non-receptor_type_23	PTPN23	transcript_variant_X2,_mRNA	2.02412	0.588	3.44238	0.000576627	0.0445072
>XM_027971849.1_PREDICTED:_Ovis_aries	deoxyuridine_triphosphatase	DUT	transcript_variant_X2,_mRNA	-1.71507	0.498371	-3.44136	0.000578795	0.0445493
>XM_027957636.1_PREDICTED:_Ovis_aries	aminomethyltransferase	AMT	mRNA	2.56391	0.745363	3.43982	0.000582104	0.044679
>XM_027957618.1_PREDICTED:_Ovis_aries	ubiquitin_like_modifier_activating_enzyme_7	UBA7	transcript_variant_X1,_mRNA	1.78586	0.519806	3.43563	0.000591167	0.0452482
>XM_012183974.3_PREDICTED:_Ovis_aries	T-cell_surface_glycoprotein_CD1a	CD1A	transcript_variant_X1,_mRNA	1.73966	0.506798	3.43265	0.00059772	0.0453696
>XM_027958132.1_PREDICTED:_Ovis_aries	ubiquitin_specific_peptidase_13	USP13	transcript_variant_X1,_mRNA	1.56205	0.45565	3.42819	0.000607629	0.0457871
>XM_027964399.1_PREDICTED:_Ovis_aries	gamma-aminobutyric_acid_type_B_receptor_subunit_2	GABBR2	mRNA	4.53435	1.32433	3.42387	0.000617357	0.046349
>XM_027977388.1_PREDICTED:_Ovis_aries	GRAM_domain_containing_1A	GRAMD1A	transcript_variant_X1,_mRNA	1.71748	0.501832	3.42242	0.000620658	0.0464698
>XM_027977521.1_PREDICTED:_Ovis_aries	Spi-B_transcription_factor	SPIB	transcript_variant_X1,_mRNA	2.83865	0.829722	3.42121	0.000623436	0.046551
>XM_012102343.3_PREDICTED:_Ovis_aries	2-phosphoxylose_phosphatase_1	PXYLP1	transcript_variant_X2,_mRNA	-2.57718	0.754447	-3.41599	0.000635513	0.0473242
>NM_001100919.2_Ovis_aries	thyroid_hormone_receptor_alpha	THRA	mRNA	1.65458	0.48514	3.41052	0.000648382	0.0480222
>XM_027965655.1_PREDICTED:_Ovis_aries	Rho_guanine_nucleotide_exchange_factor_10_like	ARHGEF10L	transcript_variant_X10,_mRNA	2.41002	0.707429	3.40673	0.000657465	0.0485641
>XR_003586244.1_PREDICTED:_Ovis_aries	BOLA_class_I_histocompatibility_antigen,_alpha_chain_BL3-7-like	OLA-I	transcript_variant_X7,_misc_RNA	2.19342	0.644287	3.40442	0.000663057	0.0485853
>XR_003591156.1_PREDICTED:_Ovis_aries	uncharacterized_LOC114117526	LOC114117526	ncRNA	2.24467	0.659221	3.40503	0.000661566	0.0485853
>XM_015102096.2_PREDICTED:_Ovis_aries	peroxisome_proliferator_activated_receptor_gamma	PPARG	transcript_variant_X4,_mRNA	-2.24277	0.660081	-3.39772	0.000679501	0.0493092
>XM_004012141.4_PREDICTED:_Ovis_aries	arachidonate_5-lipoxygenase_activating_protein	ALOX5AP	mRNA	-1.82101	0.535991	-3.39747	0.000680114	0.0493092
>XR_003586243.1_PREDICTED:_Ovis_aries	BOLA_class_I_histocompatibility_antigen,_alpha_chain_BL3-7-like	OLA-I	transcript_variant_X4,_misc_RNA	2.20063	0.648758	3.39207	0.000693677	0.0499844
>XM_027964361.1_PREDICTED:_Ovis_aries	family_with_sequence_similarity_160_member_B2	FAM160B2	transcript_variant_X7,_mRNA	2.73436	0.806217	3.39159	0.000694884	0.0499844

## Sheet: DESeq2 CNxEN
Differentially expressed transcripts between CN and EN groups
Contig	Description	Shortcut	Type	log2FoldChange	lfcSE	stat	pvalue	padj
>XM_004016241.3_PREDICTED:_Ovis_aries	hemoglobin_fetal_subunit_beta	HBB	mRNA	-2.88394	0.266211	-10.8333	2.39373e-27	5.92208e-23
>XM_027971810.1_PREDICTED:_Ovis_aries	guanylate-binding_protein_2-like	LOC114108739	mRNA	-3.26417	0.332183	-9.82642	8.66449e-23	1.0718e-18
>XM_027978814.1_PREDICTED:_Ovis_aries	leukocyte_immunoglobulin-like_receptor_subfamily_A_member_5	LILRA5	transcript_variant_X1,_mRNA	-2.33467	0.253765	-9.2001	3.57608e-20	2.94908e-16
>XM_004006903.4_PREDICTED:_Ovis_aries	complement_C3a_receptor_1	C3AR1	mRNA	-2.24491	0.257362	-8.72277	2.71466e-18	1.67902e-14
>XM_027971850.1_PREDICTED:_Ovis_aries	deoxyuridine_triphosphatase	DUT	transcript_variant_X3,_mRNA	-1.99932	0.234847	-8.51328	1.69075e-17	8.36581e-14
>NM_001113425.2_Ovis_aries	beta-C_globin	HBBC	mRNA	-3.12726	0.395025	-7.9166	2.44088e-15	8.62678e-12
>XM_027968979.1_PREDICTED:_Ovis_aries	GTPase_IMAP_family_member_8-like	GIMAP8	mRNA	-3.40339	0.445782	-7.63464	2.26454e-14	7.00309e-11
>XM_027960982.1_PREDICTED:_Ovis_aries	thioredoxin-like_protein_1	TXNL1	mRNA	-5.17118	0.681109	-7.5923	3.14268e-14	8.63887e-11
>XM_015094251.2_PREDICTED:_Ovis_aries	peptidyl-tRNA_hydrolase_domain_containing_1	PTRHD1	mRNA	-1.53452	0.20549	-7.46761	8.16645e-14	2.02038e-10
>XM_027958927.1_PREDICTED:_Ovis_aries	boLa_class_II_histocompatibility_antigen,_DQB*0101_beta_chain	DQB	transcript_variant_X1,_mRNA	-2.79794	0.37932	-7.37619	1.62886e-13	3.35816e-10
>XM_027971849.1_PREDICTED:_Ovis_aries	deoxyuridine_triphosphatase	DUT	transcript_variant_X2,_mRNA	-1.82827	0.257472	-7.10084	1.24004e-12	2.04523e-09
>XR_003589146.1_PREDICTED:_Ovis_aries	uncharacterized_LOC114114493	LOC114114493	ncRNA	1.74216	0.246552	7.06608	1.59376e-12	2.46435e-09
>XM_027958759.1_PREDICTED:_Ovis_aries	MHC_class_I_polypeptide-related_sequence_B	MICB	transcript_variant_X1,_mRNA	4.52331	0.653338	6.92339	4.40965e-12	6.41734e-09
>NM_001009778.1_Ovis_aries	aldehyde_dehydrogenase_1_family_member_A1	ALDH1A1	mRNA	-3.83181	0.562125	-6.81666	9.31833e-12	1.28075e-08
>XM_015097174.2_PREDICTED:_Ovis_aries	acyl-coenzyme_A_thioesterase_1-like	LOC101104407	mRNA	-3.75558	0.560851	-6.69623	2.13869e-11	2.40505e-08
>XM_027976144.1_PREDICTED:_Ovis_aries	C4b-binding_protein_alpha_chain-like	C4BPA	mRNA	-3.28603	0.490612	-6.69781	2.11561e-11	2.40505e-08
>XM_015094219.2_PREDICTED:_Ovis_aries	ribonucleotide_reductase_regulatory_subunit_M2	RRM2	mRNA	-1.75999	0.26509	-6.63923	3.15335e-11	3.39191e-08
>XM_027973251.1_PREDICTED:_Ovis_aries	carbonic_anhydrase_2	CA2	mRNA	-2.20839	0.33528	-6.5867	4.49709e-11	4.45032e-08
>XM_027967016.1_PREDICTED:_Ovis_aries	bolA_family_member_3	BOLA3	mRNA	-2.02384	0.30801	-6.57071	5.0077e-11	4.76502e-08
>NM_001308595.1_Ovis_aries	interleukin_1_receptor_antagonist	IL1RN	mRNA	-2.58286	0.398103	-6.48791	8.70376e-11	7.1777e-08
>XM_027971848.1_PREDICTED:_Ovis_aries	deoxyuridine_triphosphatase	DUT	transcript_variant_X1,_mRNA	-1.89854	0.29469	-6.44249	1.1753e-10	9.37963e-08
>XM_015103798.2_PREDICTED:_Ovis_aries	SEC11_homolog_C,_signal_peptidase_complex_subunit	SEC11C	mRNA	-1.78255	0.280637	-6.35178	2.12833e-10	1.64103e-07
>XM_004019011.3_PREDICTED:_Ovis_aries	ubiquitin_D-like	UBD	mRNA	-1.82082	0.292122	-6.23308	4.57345e-10	3.23278e-07
>XR_003590278.1_PREDICTED:_Ovis_aries	uncharacterized_LOC114116349	LOC114116349	ncRNA	1.71712	0.276744	6.20472	5.47939e-10	3.76556e-07
>XM_027963132.1_PREDICTED:_Ovis_aries	G_protein-coupled_receptor_174	GPR174	mRNA	1.9541	0.316992	6.16451	7.07028e-10	4.60313e-07
>XM_015097512.2_PREDICTED:_Ovis_aries	solute_carrier_family_22_member_1	SLC22A1	transcript_variant_X1,_mRNA	-3.30939	0.540915	-6.11813	9.46805e-10	5.57713e-07
>XM_027980017.1_PREDICTED:_Ovis_aries	SID1_transmembrane_family_member_1	SIDT1	transcript_variant_X2,_mRNA	1.82029	0.306885	5.93151	3.0016e-09	1.72697e-06
>XM_027965600.1_PREDICTED:_Ovis_aries	mitochondrial_contact_site_and_cristae_organizing_system_subunit_10	MICOS10	transcript_variant_X2,_mRNA	-1.55826	0.263452	-5.91479	3.323e-09	1.86843e-06
>XM_027968995.1_PREDICTED:_Ovis_aries	GTPase,_IMAP_family_member_1	GIMAP1	transcript_variant_X2,_mRNA	-2.00451	0.342776	-5.84788	4.97888e-09	2.51382e-06
>XM_027958928.1_PREDICTED:_Ovis_aries	boLa_class_II_histocompatibility_antigen,_DQB*0101_beta_chain	DQB	transcript_variant_X2,_mRNA	-2.14362	0.368632	-5.81505	6.06151e-09	2.99923e-06
>XM_027958009.1_PREDICTED:_Ovis_aries	EPM2A_interacting_protein_1	EPM2AIP1	transcript_variant_X1,_mRNA	1.50325	0.259801	5.78617	7.20086e-09	3.41369e-06
>XM_027958132.1_PREDICTED:_Ovis_aries	ubiquitin_specific_peptidase_13	USP13	transcript_variant_X1,_mRNA	2.17083	0.375035	5.78835	7.10811e-09	3.41369e-06
>XM_027966579.1_PREDICTED:_Ovis_aries	dystrobrevin_beta	DTNB	transcript_variant_X14,_mRNA	-3.01503	0.521835	-5.77774	7.571e-09	3.45975e-06
>XM_027979849.1_PREDICTED:_Ovis_aries	interferon-induced_very_large_GTPase_1-like	GVINP1	mRNA	1.63007	0.282259	5.77508	7.69144e-09	3.45975e-06
>XM_004022049.4_PREDICTED:_Ovis_aries	5'-aminolevulinate_synthase_2	ALAS2	transcript_variant_X2,_mRNA	-3.34909	0.581233	-5.76205	8.30969e-09	3.6711e-06
>XM_004018229.3_PREDICTED:_Ovis_aries	exo/endonuclease_G	EXOG	transcript_variant_X2,_mRNA	1.96546	0.34236	5.7409	9.41721e-09	3.94885e-06
>XR_003586036.1_PREDICTED:_Ovis_aries	exo/endonuclease_G	EXOG	transcript_variant_X6,_misc_RNA	1.90576	0.332327	5.7346	9.77404e-09	3.96409e-06
>XM_027965743.1_PREDICTED:_Ovis_aries	translocator_protein	TSPO	transcript_variant_X1,_mRNA	-1.97468	0.345401	-5.71706	1.08384e-08	4.25624e-06
>XM_012187922.3_PREDICTED:_Ovis_aries	mitochondrial_amidoxime_reducing_component_2	MARC2	mRNA	-2.07597	0.36689	-5.65831	1.52874e-08	5.81861e-06
>XM_004017065.4_PREDICTED:_Ovis_aries	threonyl-tRNA_synthetase	TARS	mRNA	-1.55459	0.277858	-5.5949	2.20755e-08	7.80211e-06
>XM_004018943.4_PREDICTED:_Ovis_aries	lymphocyte_antigen_6_family_member_G6C	LY6G6C	mRNA	4.08007	0.729684	5.59156	2.25041e-08	7.84158e-06
>XM_027963387.1_PREDICTED:_Ovis_aries	cyclin_dependent_kinase_16	CDK16	transcript_variant_X2,_mRNA	1.53425	0.275525	5.56845	2.57018e-08	8.58817e-06
>XM_027978856.1_PREDICTED:_Ovis_aries	leukocyte_immunoglobulin-like_receptor_subfamily_A_member_6	LILRA6	mRNA	3.07971	0.553378	5.56529	2.61716e-08	8.58817e-06
>XM_027965599.1_PREDICTED:_Ovis_aries	mitochondrial_contact_site_and_cristae_organizing_system_subunit_10	MICOS10	transcript_variant_X1,_mRNA	-1.90425	0.342823	-5.55462	2.78215e-08	8.93901e-06
>XM_027959722.1_PREDICTED:_Ovis_aries	high_mobility_group_protein_B2	HMGB2	mRNA	-2.32996	0.422477	-5.515	3.48775e-08	1.09224e-05
>XM_004001979.4_PREDICTED:_Ovis_aries	origin_recognition_complex_subunit_1	ORC1	mRNA	-1.71318	0.313316	-5.46789	4.55414e-08	1.32552e-05
>XM_027978723.1_PREDICTED:_Ovis_aries	cationic_amino_acid_transporter_3-like	LOC101117868	transcript_variant_X4,_mRNA	-2.01506	0.368766	-5.46432	4.64673e-08	1.33675e-05
>XM_027980317.1_PREDICTED:_Ovis_aries	RNA_binding_motif_protein_46	RBM46	transcript_variant_X2,_mRNA	-3.97727	0.730714	-5.443	5.23911e-08	1.46964e-05
>XM_027968859.1_PREDICTED:_Ovis_aries	ubinuclein_2	UBN2	transcript_variant_X2,_mRNA	1.66288	0.307134	5.41418	6.15714e-08	1.67393e-05
>XR_003586033.1_PREDICTED:_Ovis_aries	exo/endonuclease_G	EXOG	transcript_variant_X3,_misc_RNA	1.65935	0.306645	5.41131	6.25638e-08	1.68242e-05
>XM_027968986.1_PREDICTED:_Ovis_aries	transmembrane_protein_176B-like	LOC114114576	transcript_variant_X1,_mRNA	1.62127	0.30408	5.33173	9.72792e-08	2.3595e-05
>XR_003589227.1_PREDICTED:_Ovis_aries	transmembrane_protein_176B-like	LOC114114576	transcript_variant_X5,_misc_RNA	1.50392	0.283462	5.30554	1.12339e-07	2.67236e-05
>XM_027971400.1_PREDICTED:_Ovis_aries	rho_GTPase-activating_protein_20-like	ARHGAP20	mRNA	-4.53555	0.857943	-5.28654	1.24653e-07	2.93707e-05
>XM_027960150.1_PREDICTED:_Ovis_aries	bolA-like_protein_3	LOC114110247	mRNA	-2.02465	0.384235	-5.26929	1.36952e-07	3.01987e-05
>XM_015096984.2_PREDICTED:_Ovis_aries	RNA_binding_protein,_mRNA_processing_factor_2	RBPMS2	mRNA	1.92322	0.364539	5.27577	1.322e-07	3.01987e-05
>XM_027969135.1_PREDICTED:_Ovis_aries	GTPase_IMAP_family_member_7-like	GIMAP7	mRNA	2.5726	0.488346	5.26798	1.37932e-07	3.01987e-05
>XM_027957345.1_PREDICTED:_Ovis_aries	ankyrin_repeat_and_SOCS_box_containing_2	ASB2	mRNA	-3.10987	0.591341	-5.25902	1.44828e-07	3.06242e-05
>XR_003585997.1_PREDICTED:_Ovis_aries	XPC_complex_subunit,_DNA_damage_recognition_and_repair_factor	XPC	transcript_variant_X6,_misc_RNA	1.75382	0.333413	5.26021	1.43894e-07	3.06242e-05
>XM_027958597.1_PREDICTED:_Ovis_aries	40S_ribosomal_protein_S6-like	LOC106991797	mRNA	-1.57447	0.300048	-5.2474	1.54262e-07	3.18037e-05
>XM_012181046.3_PREDICTED:_Ovis_aries	methyltransferase_like_17	METTL17	mRNA	1.6095	0.307018	5.24237	1.58528e-07	3.24131e-05
>XM_027978720.1_PREDICTED:_Ovis_aries	cationic_amino_acid_transporter_3-like	LOC101117868	transcript_variant_X1,_mRNA	-1.88625	0.360668	-5.22987	1.6963e-07	3.43987e-05
>XM_004004750.4_PREDICTED:_Ovis_aries	diazepam_binding_inhibitor,_acyl-CoA_binding_protein	DBI	mRNA	-1.54551	0.298519	-5.17725	2.25175e-07	4.28525e-05
>XR_003591447.1_PREDICTED:_Ovis_aries	uncharacterized_LOC105609117	LOC105609117	ncRNA	1.66099	0.321484	5.16664	2.38334e-07	4.40029e-05
>XM_027978724.1_PREDICTED:_Ovis_aries	cationic_amino_acid_transporter_3-like	LOC101117868	transcript_variant_X5,_mRNA	-2.03714	0.394857	-5.15917	2.48046e-07	4.51226e-05
>XM_027968996.1_PREDICTED:_Ovis_aries	GTPase,_IMAP_family_member_1	GIMAP1	transcript_variant_X3,_mRNA	-1.83591	0.357605	-5.1339	2.83794e-07	4.94441e-05
>XM_015093620.2_PREDICTED:_Ovis_aries	tubulointerstitial_nephritis_antigen_like_1	TINAGL1	mRNA	-4.52896	0.882602	-5.13138	2.87631e-07	4.97622e-05
>XM_027962020.1_PREDICTED:_Ovis_aries	hemoglobin_subunit_alpha-1/2	HBA1	mRNA	-2.83822	0.556696	-5.09833	3.42659e-07	5.76693e-05
>XM_015103978.2_PREDICTED:_Ovis_aries	hemoglobin_subunit_alpha-1/2	HBA1	mRNA	-2.8631	0.561846	-5.09587	3.47139e-07	5.80284e-05
>XM_012183813.3_PREDICTED:_Ovis_aries	MICOS_complex_subunit_MIC10	MIO10	mRNA	-1.77032	0.348479	-5.08014	3.77163e-07	6.22067e-05
>XR_003586035.1_PREDICTED:_Ovis_aries	exo/endonuclease_G	EXOG	transcript_variant_X5,_misc_RNA	1.7501	0.346748	5.04716	4.48419e-07	7.20382e-05
>XM_004010443.4_PREDICTED:_Ovis_aries	BUB1_mitotic_checkpoint_serine/threonine_kinase_B	BUB1B	mRNA	-1.79677	0.356504	-5.03996	4.65623e-07	7.39397e-05
>XM_027976188.1_PREDICTED:_Ovis_aries	SRY-box_13	SOX13	transcript_variant_X2,_mRNA	2.26223	0.449756	5.02991	4.90715e-07	7.60902e-05
>XM_027980220.1_PREDICTED:_Ovis_aries	SLAM_family_member_9-like	SLAMF9	mRNA	-1.54442	0.308654	-5.00373	5.62316e-07	8.49462e-05
>XM_027977432.1_PREDICTED:_Ovis_aries	free_fatty_acid_receptor_3	FFAR3	mRNA	-3.31165	0.662542	-4.99839	5.78109e-07	8.66813e-05
>XR_003589160.1_PREDICTED:_Ovis_aries	uncharacterized_LOC114114509	LOC114114509	transcript_variant_X1,_ncRNA	1.50506	0.301681	4.98893	6.07132e-07	9.03384e-05
>NM_001009212.1_Ovis_aries	calpain_3	CAPN3	mRNA	2.10109	0.421222	4.98809	6.09802e-07	9.03384e-05
>XM_027974881.1_PREDICTED:_Ovis_aries	myosin-3	MYH3	mRNA	-3.40497	0.685361	-4.96815	6.75956e-07	9.7016e-05
>XM_027970780.1_PREDICTED:_Ovis_aries	cyclin_A2	CCNA2	mRNA	-1.58682	0.320285	-4.95439	7.25572e-07	0.000102575
>XM_012105177.3_PREDICTED:_Ovis_aries	ubiquitin_carboxyl-terminal_hydrolase_isozyme_L3	LOC101105383	mRNA	-2.01902	0.408304	-4.9449	7.61846e-07	0.000105888
>XM_012189203.3_PREDICTED:_Ovis_aries	endogenous_retrovirus_group_K_member_5_Gag_polyprotein	LOC105616742	transcript_variant_X2,_mRNA	1.96021	0.397621	4.92986	8.22881e-07	0.000113732
>XM_027958878.1_PREDICTED:_Ovis_aries	alpha_tubulin_acetyltransferase_1	ATAT1	transcript_variant_X6,_mRNA	1.9094	0.388632	4.91312	8.96403e-07	0.000122525
>XM_027971847.1_PREDICTED:_Ovis_aries	guanylate-binding_protein_2-like	LOC114115617	mRNA	-3.10298	0.633051	-4.90162	9.50484e-07	0.000129203
>XM_004012140.4_PREDICTED:_Ovis_aries	mesenteric_estrogen_dependent_adipogenesis	MEDAG	mRNA	-8.92646	1.82706	-4.88569	1.03066e-06	0.000135631
>XM_027978293.1_PREDICTED:_Ovis_aries	MIA_SH3_domain_containing	MIA	transcript_variant_X1,_mRNA	1.98645	0.406888	4.88207	1.0498e-06	0.000137418
>XR_003587319.1_PREDICTED:_Ovis_aries	uncharacterized_LOC114111243	LOC114111243	ncRNA	-2.04364	0.418926	-4.87828	1.07016e-06	0.000138616
>XR_003586032.1_PREDICTED:_Ovis_aries	exo/endonuclease_G	EXOG	transcript_variant_X1,_misc_RNA	1.50425	0.308323	4.87882	1.0672e-06	0.000138616
>XM_012189124.3_PREDICTED:_Ovis_aries	cytochrome_c_oxidase_copper_chaperone	LOC101117181	mRNA	-1.79956	0.370954	-4.85116	1.22741e-06	0.000151831
>XM_004012079.4_PREDICTED:_Ovis_aries	acyl_carrier_protein,_mitochondrial	LOC101116843	mRNA	-1.78136	0.367348	-4.84924	1.23933e-06	0.000152542
>XM_027965785.1_PREDICTED:_Ovis_aries	glycine_cleavage_system_H_protein,_mitochondrial	LOC114113596	mRNA	-3.28779	0.68043	-4.83194	1.3521e-06	0.000162383
>XM_027974191.1_PREDICTED:_Ovis_aries	thymidine_kinase_1	TK1	mRNA	-1.69797	0.354234	-4.79334	1.64029e-06	0.000193242
>XR_003587310.1_PREDICTED:_Ovis_aries	uncharacterized_LOC114111235	LOC114111235	ncRNA	2.26411	0.472902	4.7877	1.68706e-06	0.000195835
>XM_027978812.1_PREDICTED:_Ovis_aries	leukocyte_immunoglobulin-like_receptor_subfamily_A_member_5	LILRA5	transcript_variant_X1,_mRNA	-1.86205	0.389435	-4.78142	1.74061e-06	0.000199365
>XM_012106988.2_PREDICTED:_Ovis_aries	high_mobility_group_nucleosome_binding_domain_5	HMGN5	partial_mRNA	-1.73725	0.364168	-4.77047	1.83801e-06	0.000206485
>XM_027965059.1_PREDICTED:_Ovis_aries	splicing_factor_3b_subunit_1	SF3B1	transcript_variant_X5,_mRNA	1.84769	0.387438	4.76899	1.85148e-06	0.000206485
>XR_003586034.1_PREDICTED:_Ovis_aries	exo/endonuclease_G	EXOG	transcript_variant_X4,_misc_RNA	1.7432	0.365841	4.7649	1.88943e-06	0.000209617
>XM_004012450.4_PREDICTED:_Ovis_aries	C-C_motif_chemokine_ligand_14	CCL14	mRNA	-2.13063	0.450004	-4.7347	2.19377e-06	0.000237004
>NM_001166198.1_Ovis_aries	four_and_a_half_LIM_domains_1	FHL1	mRNA	2.30853	0.487753	4.73299	2.21238e-06	0.000237976
>XM_012189202.3_PREDICTED:_Ovis_aries	endogenous_retrovirus_group_K_member_5_Gag_polyprotein	LOC105616742	transcript_variant_X1,_mRNA	1.90733	0.403405	4.72808	2.26648e-06	0.000241693
>XR_003589344.1_PREDICTED:_Ovis_aries	uncharacterized_LOC105610486	LOC105610486	transcript_variant_X2,_ncRNA	-1.7374	0.368584	-4.71373	2.43226e-06	0.000257154
>XM_004012860.4_PREDICTED:_Ovis_aries	cell_division_cycle_6	CDC6	transcript_variant_X1,_mRNA	-1.85044	0.394445	-4.69124	2.71554e-06	0.000279927
>XM_004013098.3_PREDICTED:_Ovis_aries	baculoviral_IAP_repeat_containing_5	BIRC5	transcript_variant_X1,_mRNA	-1.78509	0.380672	-4.68931	2.74131e-06	0.000281411
>XR_003591276.1_PREDICTED:_Ovis_aries	transglutaminase_2	TGM2	transcript_variant_X2,_misc_RNA	2.45649	0.52479	4.68089	2.85626e-06	0.000292
>XM_027958361.1_PREDICTED:_Ovis_aries	putative_60S_ribosomal_protein_L37a	LOC114109518	mRNA	-1.84541	0.395273	-4.6687	3.03112e-06	0.000304837
>XM_004019447.3_PREDICTED:_Ovis_aries	HIV-1_Tat_interactive_protein_2	HTATIP2	mRNA	-1.79457	0.384947	-4.66187	3.13342e-06	0.000311329
>XM_027978721.1_PREDICTED:_Ovis_aries	cationic_amino_acid_transporter_3-like	LOC101117868	transcript_variant_X2,_mRNA	-1.86644	0.400882	-4.65585	3.22645e-06	0.00031929
>XM_027961745.1_PREDICTED:_Ovis_aries	SH2B_adaptor_protein_1	SH2B1	transcript_variant_X2,_mRNA	1.90637	0.411675	4.63077	3.64314e-06	0.000349346
>XM_027976099.1_PREDICTED:_Ovis_aries	chromosome_12_C1orf53_homolog	C12H1orf53	partial_mRNA	-2.36857	0.512727	-4.61956	3.84557e-06	0.000363127
>XM_027956301.1_PREDICTED:_Ovis_aries	basic_leucine_zipper_ATF-like_transcription_factor_3	BATF3	mRNA	-1.65576	0.359247	-4.60896	4.04682e-06	0.00037904
>XM_027972149.1_PREDICTED:_Ovis_aries	eukaryotic_translation_initiation_factor_3_subunit_J	EIF3J	mRNA	-2.14953	0.467159	-4.60129	4.19884e-06	0.000387373
>XM_027969364.1_PREDICTED:_Ovis_aries	SURP_and_G-patch_domain_containing_2	SUGP2	transcript_variant_X2,_mRNA	1.91724	0.417395	4.59334	4.36198e-06	0.000399687
>XM_027964874.1_PREDICTED:_Ovis_aries	syndecan_3	SDC3	mRNA	-2.12991	0.463844	-4.59187	4.39287e-06	0.000399823
>XM_027975234.1_PREDICTED:_Ovis_aries	sperm_associated_antigen_5	SPAG5	mRNA	-1.50216	0.32763	-4.58493	4.54128e-06	0.000406648
>XM_004014303.4_PREDICTED:_Ovis_aries	NSF_attachment_protein_beta	NAPB	mRNA	1.70693	0.372335	4.5844	4.55301e-06	0.000406648
>XM_015103095.2_PREDICTED:_Ovis_aries	cytochrome_c_oxidase_subunit_5A,_mitochondrial	LOC101117799	mRNA	-1.95512	0.427261	-4.57593	4.74098e-06	0.0004189
>XM_004010655.4_PREDICTED:_Ovis_aries	cyclin_dependent_kinase_inhibitor_3	CDKN3	transcript_variant_X1,_mRNA	-1.74986	0.390341	-4.4829	7.36359e-06	0.000589034
>XM_027973193.1_PREDICTED:_Ovis_aries	lysosomal_protein_transmembrane_4_beta	LAPTM4B	transcript_variant_X2,_mRNA	-2.09777	0.470424	-4.45933	8.2217e-06	0.000637633
>XM_027978529.1_PREDICTED:_Ovis_aries	BCL2_binding_component_3	BBC3	transcript_variant_X2,_mRNA	-2.21636	0.498505	-4.44602	8.74762e-06	0.000670019
>XR_001435621.2_PREDICTED:_Ovis_aries	60S_ribosomal_protein_L35a_pseudogene	LOC101114892	misc_RNA	-2.25301	0.507054	-4.44334	8.85742e-06	0.000676335
>XM_027963346.1_PREDICTED:_Ovis_aries	teneurin_transmembrane_protein_1	TENM1	mRNA	2.18197	0.493735	4.41932	9.90121e-06	0.000735603
>XM_012180181.3_PREDICTED:_Ovis_aries	N-acylethanolamine_acid_amidase	NAAA	transcript_variant_X1,_mRNA	-2.41458	0.547027	-4.41401	1.01475e-05	0.000747174
>XM_012175860.3_PREDICTED:_Ovis_aries	surfeit_2	SURF2	mRNA	-1.5272	0.346639	-4.40573	1.05426e-05	0.000762643
>XM_004011664.4_PREDICTED:_Ovis_aries	60S_ribosomal_protein_L13a	LOC101109545	mRNA	-1.78583	0.405623	-4.40268	1.06921e-05	0.000771203
>XM_027975960.1_PREDICTED:_Ovis_aries	hemicentin_1	HMCN1	transcript_variant_X2,_mRNA	4.06812	0.924167	4.40194	1.07288e-05	0.000771603
>XM_004016125.4_PREDICTED:_Ovis_aries	10_kDa_heat_shock_protein,_mitochondrial	HSPE1	mRNA	-1.73451	0.39433	-4.39864	1.08931e-05	0.000778891
>XM_015095111.2_PREDICTED:_Ovis_aries	ankyrin_repeat_domain_7	ANKRD7	mRNA	2.82308	0.642829	4.39165	1.12494e-05	0.000795175
>XM_027960721.1_PREDICTED:_Ovis_aries	serpin_B4-like	SERPINB4	mRNA	-3.20445	0.730476	-4.3868	1.15033e-05	0.000805299
>XM_012177343.3_PREDICTED:_Ovis_aries	GTPase,_IMAP_family_member_1	GIMAP1	transcript_variant_X1,_mRNA	-1.72516	0.393202	-4.38747	1.14679e-05	0.000805299
>XM_027964548.1_PREDICTED:_Ovis_aries	60S_ribosomal_protein_L30-like	LOC114112992	mRNA	-1.60102	0.365136	-4.38473	1.16129e-05	0.000805299
>XM_004017815.4_PREDICTED:_Ovis_aries	WD_repeat_domain_61	WDR61	mRNA	-1.55692	0.355536	-4.37908	1.19182e-05	0.000818007
>XR_003590464.1_PREDICTED:_Ovis_aries	uncharacterized_LOC114116605	LOC114116605	ncRNA	2.05385	0.471364	4.35724	1.31711e-05	0.000890818
>XM_027959006.1_PREDICTED:_Ovis_aries	arginine_and_serine_rich_coiled-coil_1	RSRC1	transcript_variant_X1,_mRNA	-1.62054	0.372495	-4.35049	1.35834e-05	0.000913186
>XM_004013374.4_PREDICTED:_Ovis_aries	SH3_and_cysteine_rich_domain_2	STAC2	transcript_variant_X2,_mRNA	1.5443	0.35555	4.34341	1.4029e-05	0.000928013
>XM_004017180.4_PREDICTED:_Ovis_aries	RNA_binding_motif_protein_46	RBM46	transcript_variant_X1,_mRNA	-2.97221	0.68608	-4.33216	1.47657e-05	0.000963859
>XM_015094961.2_PREDICTED:_Ovis_aries	microfibril_associated_protein_5	MFAP5	transcript_variant_X1,_mRNA	-6.62873	1.53144	-4.32843	1.50176e-05	0.000973087
>XM_027980257.1_PREDICTED:_Ovis_aries	liprin-alpha-1-like	PPFIA1	mRNA	-1.90521	0.440543	-4.32467	1.5276e-05	0.000981629
>XM_004012861.4_PREDICTED:_Ovis_aries	cell_division_cycle_6	CDC6	transcript_variant_X2,_mRNA	-2.05821	0.476285	-4.32138	1.55058e-05	0.000991205
>XM_015105084.2_PREDICTED:_Ovis_aries	ALG13_UDP-N-acetylglucosaminyltransferase_subunit	ALG13	transcript_variant_X2,_mRNA	1.98585	0.460035	4.31674	1.58349e-05	0.000999485
>XR_003586699.1_PREDICTED:_Ovis_aries	PRELI_domain_containing_3A	PRELID3A	transcript_variant_X3,_misc_RNA	2.25013	0.521761	4.31257	1.61365e-05	0.00101531
>XM_027965561.1_PREDICTED:_Ovis_aries	alkaline_phosphatase,_biomineralization_associated	ALPL	transcript_variant_X3,_mRNA	-1.77821	0.412617	-4.30959	1.63554e-05	0.00101667
>XM_004004625.4_PREDICTED:_Ovis_aries	SPC25_component_of_NDC80_kinetochore_complex	SPC25	mRNA	-2.51844	0.585502	-4.30133	1.69776e-05	0.00103026
>XM_027966773.1_PREDICTED:_Ovis_aries	coiled-coil-helix-coiled-coil-helix_domain_containing_5	CHCHD5	transcript_variant_X3,_mRNA	1.59616	0.3711	4.30116	1.69905e-05	0.00103026
>XM_012099165.3_PREDICTED:_Ovis_aries	TNF_superfamily_member_10	TNFSF10	transcript_variant_X2,_mRNA	2.03547	0.474637	4.28847	1.79909e-05	0.00106738
>XM_027973188.1_PREDICTED:_Ovis_aries	reactive_intermediate_imine_deaminase_A_homolog	RIDA	mRNA	-1.72332	0.403759	-4.26819	1.97063e-05	0.00113454
>XM_012103549.3_PREDICTED:_Ovis_aries	erythrocyte_membrane_protein_band_4.1_like_3	EPB41L3	transcript_variant_X12,_mRNA	1.59762	0.374322	4.26803	1.97203e-05	0.00113454
>XM_027966550.1_PREDICTED:_Ovis_aries	beaded_filament_structural_protein_2	BFSP2	mRNA	-2.0547	0.482485	-4.25859	2.0572e-05	0.0011727
>NM_001161379.1_Ovis_aries	apolipoprotein_B_mRNA_editing_enzyme,_catalytic_polypeptide-like	APOBEC3Z1	mRNA	-2.93876	0.692193	-4.24558	2.18031e-05	0.00121763
>XM_027977140.1_PREDICTED:_Ovis_aries	up-regulated_during_skeletal_muscle_growth_protein_5	LOC114117623	mRNA	-1.56452	0.368502	-4.24561	2.17996e-05	0.00121763
>XM_027967184.1_PREDICTED:_Ovis_aries	antigen_WC1.1-like	WC1.1L	mRNA	2.41967	0.569839	4.24623	2.17397e-05	0.00121763
>XM_015105085.2_PREDICTED:_Ovis_aries	ALG13_UDP-N-acetylglucosaminyltransferase_subunit	ALG13	transcript_variant_X3,_mRNA	2.37516	0.560096	4.24063	2.22892e-05	0.0012364
>XM_027972419.1_PREDICTED:_Ovis_aries	UL16-binding_protein_2-like	ULBP2	transcript_variant_X4,_mRNA	2.23499	0.527625	4.23594	2.27599e-05	0.00124851
>XM_027980013.1_PREDICTED:_Ovis_aries	SID1_transmembrane_family_member_1	SIDT1	transcript_variant_X1,_mRNA	1.54244	0.364183	4.23534	2.28202e-05	0.00124905
>XM_004022672.3_PREDICTED:_Ovis_aries	gamma-aminobutyric_acid_type_A_receptor_epsilon_subunit	GABRE	mRNA	1.59799	0.377686	4.231	2.3265e-05	0.00126779
>XM_015096907.2_PREDICTED:_Ovis_aries	ribonuclease_4	RNASE4	mRNA	-2.18559	0.516846	-4.2287	2.35049e-05	0.00127805
>XM_027977987.1_PREDICTED:_Ovis_aries	leukocyte_immunoglobulin-like_receptor_subfamily_A_member_6	LILRA6	mRNA	-1.69908	0.401853	-4.22812	2.35648e-05	0.0012785
>XM_027975362.1_PREDICTED:_Ovis_aries	myeloperoxidase	MPO	mRNA	-3.79729	0.899058	-4.22364	2.40393e-05	0.00129854
>XM_004013903.4_PREDICTED:_Ovis_aries	denticleless_E3_ubiquitin_protein_ligase_homolog	DTL	mRNA	-2.00093	0.474386	-4.21794	2.46545e-05	0.00132002
>XR_003590129.1_PREDICTED:_Ovis_aries	uncharacterized_LOC114116087	LOC114116087	transcript_variant_X1,_ncRNA	1.70906	0.406636	4.20294	2.63476e-05	0.00137809
>XM_027973390.1_PREDICTED:_Ovis_aries	zinc_finger_protein_34	ZNF34	transcript_variant_X2,_mRNA	1.87249	0.445834	4.19997	2.66949e-05	0.00138746
>XM_027974853.1_PREDICTED:_Ovis_aries	Golgi_apparatus_membrane_protein_TVP23_homolog_B	LOC105601852	mRNA	-2.03029	0.48503	-4.1859	2.84036e-05	0.00145181
>XM_027958882.1_PREDICTED:_Ovis_aries	BOLA_class_I_histocompatibility_antigen,_alpha_chain_BL3-7-like	OLA-I	transcript_variant_X4,_mRNA	2.23777	0.534892	4.18359	2.8694e-05	0.00145474
>XM_027963903.1_PREDICTED:_Ovis_aries	hemogen	HEMGN	mRNA	-3.01153	0.721382	-4.17467	2.98418e-05	0.00149754
>XM_012135557.3_PREDICTED:_Ovis_aries	grancalcin	GCA	mRNA	-1.94502	0.467831	-4.15753	3.21713e-05	0.00157608
>XM_004016355.4_PREDICTED:_Ovis_aries	coiled-coil_domain_containing_34	CCDC34	mRNA	-1.79557	0.432462	-4.15197	3.29631e-05	0.00160533
>XM_027968128.1_PREDICTED:_Ovis_aries	mannosyl_beta-1,4--glycoprotein_beta-1,4-N-acetylglucosaminyltransferase	MGAT3	mRNA	-3.51841	0.847808	-4.15001	3.32458e-05	0.00160959
>XR_003587507.1_PREDICTED:_Ovis_aries	uncharacterized_LOC105605487	LOC105605487	transcript_variant_X3,_ncRNA	2.32485	0.560181	4.15019	3.32205e-05	0.00160959
>XR_003590131.1_PREDICTED:_Ovis_aries	UL16-binding_protein_2-like	ULBP2	transcript_variant_X1,_misc_RNA	1.98496	0.480276	4.13296	3.58121e-05	0.0016973
>XM_027961313.1_PREDICTED:_Ovis_aries	calcium_voltage-gated_channel_subunit_alpha1_H	CACNA1H	mRNA	1.70659	0.414289	4.11932	3.79985e-05	0.00176707
>XR_003590352.1_PREDICTED:_Ovis_aries	aarF_domain_containing_kinase_5	ADCK5	transcript_variant_X4,_misc_RNA	1.7122	0.418535	4.09094	4.29619e-05	0.00195024
>XM_027978722.1_PREDICTED:_Ovis_aries	cationic_amino_acid_transporter_3-like	LOC101117868	transcript_variant_X3,_mRNA	-1.74929	0.428291	-4.08436	4.4199e-05	0.00199177
>XM_027978432.1_PREDICTED:_Ovis_aries	zinc_finger_protein_227	LOC101109384	transcript_variant_X4,_mRNA	3.45294	0.845332	4.08472	4.41302e-05	0.00199177
>XM_012161602.2_PREDICTED:_Ovis_aries	kynurenine--oxoglutarate_transaminase_1	KYAT1	transcript_variant_X5,_mRNA	1.8091	0.443519	4.07898	4.52346e-05	0.0020237
>XM_027960305.1_PREDICTED:_Ovis_aries	dual_specificity_phosphatase_5	DUSP5	mRNA	-2.16807	0.532237	-4.0735	4.63115e-05	0.00206441
>XM_027967183.1_PREDICTED:_Ovis_aries	antigen_WC1.1	WC1.1	mRNA	2.21573	0.545343	4.06299	4.84474e-05	0.00212205
>NM_001082594.1_Ovis_aries	interleukin_13	IL13	mRNA	-3.63847	0.89736	-4.05464	5.02116e-05	0.00215292
>XM_027958876.1_PREDICTED:_Ovis_aries	alpha_tubulin_acetyltransferase_1	ATAT1	transcript_variant_X4,_mRNA	1.77455	0.438118	4.05039	5.11317e-05	0.00218103
>XM_015092447.2_PREDICTED:_Ovis_aries	SID1_transmembrane_family_member_1	SIDT1	transcript_variant_X3,_mRNA	1.80004	0.445252	4.04275	5.28285e-05	0.00223033
>XM_027974193.1_PREDICTED:_Ovis_aries	baculoviral_IAP_repeat_containing_5	BIRC5	transcript_variant_X2,_mRNA	-1.91679	0.475054	-4.03488	5.46291e-05	0.00229072
>XM_012159321.3_PREDICTED:_Ovis_aries	decorin	DCN	transcript_variant_X1,_mRNA	-5.50871	1.36595	-4.03287	5.50986e-05	0.0023065
>XM_027969760.1_PREDICTED:_Ovis_aries	ADAM_metallopeptidase_with_thrombospondin_type_1_motif_10	ADAMTS10	mRNA	1.7468	0.434249	4.02258	5.75645e-05	0.0023855
>XM_004002434.4_PREDICTED:_Ovis_aries	bolA_family_member_1	BOLA1	mRNA	-1.70945	0.425709	-4.01555	5.93082e-05	0.00242836
>XR_003589963.1_PREDICTED:_Ovis_aries	ribosomal_protein_S6_kinase_like_1	RPS6KL1	transcript_variant_X3,_misc_RNA	2.31063	0.57573	4.01339	5.98536e-05	0.0024395
>XR_001024822.3_PREDICTED:_Ovis_aries	uncharacterized_LOC105605187	LOC105605187	ncRNA	-2.32531	0.580662	-4.00458	6.21268e-05	0.00250683
>XM_004020936.3_PREDICTED:_Ovis_aries	28S_ribosomal_protein_S17,_mitochondrial	LOC101107495	transcript_variant_X4,_mRNA	-1.52109	0.380113	-4.00168	6.28953e-05	0.00252602
>XM_027961939.1_PREDICTED:_Ovis_aries	essential_meiotic_structure-specific_endonuclease_subunit_2	EME2	mRNA	2.0156	0.50541	3.98806	6.66171e-05	0.00264969
>XM_027975406.1_PREDICTED:_Ovis_aries	glutamine_rich_2	QRICH2	mRNA	-2.04365	0.513077	-3.98312	6.80174e-05	0.00269671
>XM_027972434.1_PREDICTED:_Ovis_aries	POU_class_3_homeobox_2	POU3F2	mRNA	-6.18633	1.55478	-3.97892	6.92289e-05	0.00274036
>NM_001127673.2_Ovis_aries	ras_homolog_family_member_B	RHOB	mRNA	-1.53078	0.38483	-3.97781	6.95521e-05	0.00274875
>XM_027971477.1_PREDICTED:_Ovis_aries	phosphodiesterase_8B	PDE8B	mRNA	1.5026	0.377809	3.97715	6.97462e-05	0.00275203
>XM_012103547.3_PREDICTED:_Ovis_aries	erythrocyte_membrane_protein_band_4.1_like_3	EPB41L3	transcript_variant_X10,_mRNA	1.79429	0.45141	3.97485	7.04229e-05	0.00277431
>XM_027975132.1_PREDICTED:_Ovis_aries	small_G_protein_signaling_modulator_2	SGSM2	transcript_variant_X1,_mRNA	2.40734	0.60737	3.96355	7.38441e-05	0.00287249
>XM_027977579.1_PREDICTED:_Ovis_aries	UDP-N-acetylhexosamine_pyrophosphorylase-like	UAP1	transcript_variant_X3,_mRNA	-2.22422	0.561341	-3.96232	7.42237e-05	0.00288272
>XM_004006698.4_PREDICTED:_Ovis_aries	40S_ribosomal_protein_S15a	LOC101116302	mRNA	-1.64303	0.41475	-3.96151	7.44779e-05	0.00288806
>XR_003590132.1_PREDICTED:_Ovis_aries	UL16-binding_protein_2-like	ULBP2	transcript_variant_X2,_misc_RNA	1.8114	0.457384	3.96035	7.48397e-05	0.00289755
>XM_027979083.1_PREDICTED:_Ovis_aries	proteoglycan_3-like	PRG3	mRNA	-3.62956	0.922614	-3.934	8.35449e-05	0.00315076
>XM_027975961.1_PREDICTED:_Ovis_aries	proteoglycan_4	PRG4	mRNA	-7.4428	1.89974	-3.91781	8.93585e-05	0.00333189
>XM_027978813.1_PREDICTED:_Ovis_aries	leukocyte_immunoglobulin-like_receptor_subfamily_A_member_5	LILRA5	transcript_variant_X2,_mRNA	-1.7957	0.458364	-3.91763	8.94249e-05	0.00333189
>XM_015095159.2_PREDICTED:_Ovis_aries	60S_ribosomal_protein_L23-like	LOC101103150	mRNA	-1.71324	0.437819	-3.91311	9.11134e-05	0.0033846
>XM_027966895.1_PREDICTED:_Ovis_aries	sushi,_nidogen_and_EGF_like_domains_1	SNED1	mRNA	-1.52943	0.391597	-3.90562	9.39841e-05	0.00345493
>XR_003589699.1_PREDICTED:_Ovis_aries	N-acylethanolamine_acid_amidase	NAAA	transcript_variant_X2,_misc_RNA	-1.97757	0.50685	-3.90169	9.5523e-05	0.00347999
>XM_004002490.4_PREDICTED:_Ovis_aries	selenium_binding_protein_1	SELENBP1	mRNA	1.93629	0.49654	3.89956	9.63663e-05	0.00349575
>XM_015096854.2_PREDICTED:_Ovis_aries	REC114_meiotic_recombination_protein	REC114	mRNA	-2.17807	0.559713	-3.89141	9.96644e-05	0.00358386
>XM_004016383.4_PREDICTED:_Ovis_aries	t-complex_11_like_1	TCP11L1	transcript_variant_X4,_mRNA	1.96604	0.507044	3.87745	0.000105556	0.00376291
>XR_003588611.1_PREDICTED:_Ovis_aries	dynamin_1	DNM1	transcript_variant_X14,_misc_RNA	2.40406	0.620583	3.87387	0.000107121	0.00380225
>XM_027958334.1_PREDICTED:_Ovis_aries	casein_kinase_2_beta	CSNK2B	transcript_variant_X1,_mRNA	1.73308	0.448485	3.8643	0.000111409	0.00390405
>XM_012098565.3_PREDICTED:_Ovis_aries	ubiquitin_specific_peptidase_13	USP13	transcript_variant_X2,_mRNA	2.33141	0.604132	3.85911	0.000113803	0.00397666
>XR_003590130.1_PREDICTED:_Ovis_aries	uncharacterized_LOC114116087	LOC114116087	transcript_variant_X2,_ncRNA	1.64538	0.426978	3.85355	0.000116417	0.00405046
>XR_003585710.1_PREDICTED:_Ovis_aries	uncharacterized_LOC114109014	LOC114109014	transcript_variant_X1,_ncRNA	2.81911	0.731622	3.85323	0.000116569	0.00405046
>XM_027979084.1_PREDICTED:_Ovis_aries	proteoglycan_3-like	PRG3	mRNA	-2.32095	0.60469	-3.83825	0.000123914	0.00424601
>XM_015095814.2_PREDICTED:_Ovis_aries	zinc_finger_protein_709-like	LOC105610483	transcript_variant_X1,_mRNA	1.56121	0.409016	3.817	0.000135086	0.00456561
>XM_015094962.2_PREDICTED:_Ovis_aries	microfibril_associated_protein_5	MFAP5	transcript_variant_X2,_mRNA	-6.16757	1.61664	-3.81505	0.000136154	0.00458915
>XM_004007738.4_PREDICTED:_Ovis_aries	pyruvate_dehydrogenase_kinase_4	PDK4	mRNA	-1.57134	0.413282	-3.80209	0.00014348	0.0047904
>XM_015103576.2_PREDICTED:_Ovis_aries	CD226_molecule	CD226	mRNA	1.70409	0.452057	3.76964	0.00016348	0.00528002
>XM_027963152.1_PREDICTED:_Ovis_aries	G_protein-coupled_receptor_associated_sorting_protein_1	GPRASP1	mRNA	1.57463	0.419432	3.75418	0.000173907	0.00552305
>XM_027973397.1_PREDICTED:_Ovis_aries	zinc_finger_protein_34	ZNF34	transcript_variant_X9,_mRNA	1.64664	0.438652	3.75386	0.000174132	0.00552311
>XM_027963827.1_PREDICTED:_Ovis_aries	60S_ribosomal_protein_L30-like	LOC114112563	mRNA	-3.66674	0.977411	-3.75148	0.000175795	0.00554791
>XM_027958877.1_PREDICTED:_Ovis_aries	alpha_tubulin_acetyltransferase_1	ATAT1	transcript_variant_X5,_mRNA	2.23462	0.595518	3.7524	0.000175151	0.00554791
>XM_027974493.1_PREDICTED:_Ovis_aries	reticulophagy_regulator_family_member_3	RETREG3	transcript_variant_X6,_mRNA	1.53284	0.409132	3.74657	0.00017927	0.005607
>XM_004003175.4_PREDICTED:_Ovis_aries	SEC62_homolog,_preprotein_translocation_factor	SEC62	mRNA	-1.51598	0.404897	-3.7441	0.000181039	0.00564806
>NM_001142510.1_Ovis_aries	cyclin_dependent_kinase_inhibitor_1C	CDKN1C	mRNA	-1.77677	0.474633	-3.74347	0.0001815	0.00564827
>XM_027977188.1_PREDICTED:_Ovis_aries	transglutaminase_2	TGM2	transcript_variant_X1,_mRNA	2.06982	0.552916	3.74346	0.000181503	0.00564827
>XM_027973899.1_PREDICTED:_Ovis_aries	inorganic_pyrophosphatase_2,_mitochondrial	LOC114116700	transcript_variant_X1,_mRNA	-1.67851	0.451362	-3.71878	0.000200191	0.00610071
>XM_027962478.1_PREDICTED:_Ovis_aries	secreted_frizzled_related_protein_1	SFRP1	mRNA	-7.34592	1.97637	-3.71687	0.000201703	0.00613794
>XR_001023460.2_PREDICTED:_Ovis_aries	uncharacterized_LOC105604057	LOC105604057	ncRNA	1.58884	0.428943	3.70408	0.000212158	0.00639316
>XR_001022532.2_PREDICTED:_Ovis_aries	uncharacterized_LOC105603417	LOC105603417	ncRNA	-2.30655	0.623433	-3.69975	0.00021581	0.00646526
>XM_012175787.2_PREDICTED:_Ovis_aries	G2_and_S-phase_expressed_1	GTSE1	mRNA	-1.72619	0.467257	-3.6943	0.000220497	0.0065645
>XM_027965322.1_PREDICTED:_Ovis_aries	eukaryotic_translation_initiation_factor_4E_family_member_2	EIF4E2	transcript_variant_X1,_mRNA	-1.50321	0.407347	-3.69024	0.000224041	0.00663012
>XM_015097250.2_PREDICTED:_Ovis_aries	large_tumor_suppressor_kinase_1	LATS1	transcript_variant_X2,_mRNA	1.56176	0.424291	3.68087	0.000232443	0.00679744
>XM_015099469.2_PREDICTED:_Ovis_aries	tyrosine-protein_phosphatase_non-receptor_type_substrate_1-like	PTPN1	mRNA	3.90803	1.06347	3.67478	0.000238056	0.00692069
>XM_027958715.1_PREDICTED:_Ovis_aries	serpin_B9	SERPINB9	transcript_variant_X3,_mRNA	-1.90672	0.518971	-3.67404	0.000238748	0.00693265
>XM_027980005.1_PREDICTED:_Ovis_aries	ectodermal-neural_cortex_1	ENC1	mRNA	-2.1302	0.580558	-3.66922	0.000243288	0.00700763
>XM_004021816.3_PREDICTED:_Ovis_aries	3-oxoacyl-ACP_synthase,_mitochondrial	OXSM	mRNA	-1.56577	0.426698	-3.6695	0.000243029	0.00700763
>XM_027980318.1_PREDICTED:_Ovis_aries	RNA_binding_motif_protein_46	RBM46	transcript_variant_X3,_mRNA	-3.65452	0.998691	-3.65931	0.000252893	0.00722992
>XR_003585815.1_PREDICTED:_Ovis_aries	ferritin_light_chain_pseudogene	LOC114109119	misc_RNA	1.66539	0.456059	3.65171	0.000260504	0.007374
>XM_027966138.1_PREDICTED:_Ovis_aries	olfactomedin_1	OLFM1	transcript_variant_X2,_mRNA	-2.84174	0.780332	-3.6417	0.000270839	0.0075884
>XM_004022048.4_PREDICTED:_Ovis_aries	5'-aminolevulinate_synthase_2	ALAS2	transcript_variant_X1,_mRNA	-3.55528	0.986226	-3.60493	0.000312234	0.0083061
>XM_004012141.4_PREDICTED:_Ovis_aries	arachidonate_5-lipoxygenase_activating_protein	ALOX5AP	mRNA	-1.80244	0.500067	-3.6044	0.000312875	0.0083142
>XM_027979327.1_PREDICTED:_Ovis_aries	out_at_first_homolog	OAF	mRNA	-1.50593	0.417861	-3.60391	0.000313465	0.00832094
>XM_027967911.1_PREDICTED:_Ovis_aries	C-type_lectin_domain_family_4_member_E	CLEC4E	mRNA	-2.71725	0.75697	-3.58963	0.000331144	0.00866932
>XM_027967595.1_PREDICTED:_Ovis_aries	ankyrin_repeat_domain_52	ANKRD52	transcript_variant_X3,_mRNA	2.05554	0.574892	3.57552	0.000349529	0.00899828
>XM_027963121.1_PREDICTED:_Ovis_aries	high_mobility_group_box_3	HMGB3	mRNA	-2.17032	0.607256	-3.57398	0.000351592	0.00902429
>XM_004020222.4_PREDICTED:_Ovis_aries	RAB11_family_interacting_protein_2	RAB11FIP2	transcript_variant_X2,_mRNA	2.13215	0.597622	3.56773	0.000360087	0.00917461
>XM_012190423.3_PREDICTED:_Ovis_aries	MIA_SH3_domain_containing	MIA	transcript_variant_X2,_mRNA	1.75744	0.493066	3.56432	0.000364801	0.00923764
>XM_027974705.1_PREDICTED:_Ovis_aries	collagen_type_I_alpha_1_chain	COL1A1	transcript_variant_X1,_mRNA	-3.6986	1.03923	-3.55899	0.000372291	0.00935281
>XM_027961183.1_PREDICTED:_Ovis_aries	phosphoglycolate_phosphatase	PGP	mRNA	-1.78661	0.503452	-3.54871	0.000387116	0.00969358
>XR_003587035.1_PREDICTED:_Ovis_aries	TAR_HIV-1_RNA_binding_protein_1	TARBP1	mRNA	2.41227	0.681343	3.54046	0.000399425	0.00994142
>XM_015097914.2_PREDICTED:_Ovis_aries	syndecan_2	SDC2	transcript_variant_X1,_mRNA	-5.71788	1.61648	-3.53725	0.000404323	0.0100331
>XR_003590948.1_PREDICTED:_Ovis_aries	TNF_receptor_superfamily_member_25	TNFRSF25	transcript_variant_X2,_misc_RNA	1.56384	0.444193	3.52063	0.000430525	0.0105249
>XR_003587282.1_PREDICTED:_Ovis_aries	G_protein-coupled_receptor_173	GPR173	transcript_variant_X5,_misc_RNA	2.26124	0.644734	3.50725	0.000452771	0.0109177
>XM_027957209.1_PREDICTED:_Ovis_aries	granzyme_H-like	GZMH	transcript_variant_X1,_mRNA	-2.36696	0.683463	-3.46319	0.000533821	0.012269
>XM_027967347.1_PREDICTED:_Ovis_aries	cytochrome_c_oxidase_assembly_protein_COX14	LOC101119459	transcript_variant_X2,_mRNA	-1.6086	0.464735	-3.46132	0.000537528	0.0122906
>XM_027967668.1_PREDICTED:_Ovis_aries	choline_phosphotransferase_1	CHPT1	transcript_variant_X3,_mRNA	-2.0893	0.604665	-3.45531	0.000549667	0.0124989
>XM_004020576.3_PREDICTED:_Ovis_aries	serpin_B4-like	SERPINB4	mRNA	-2.39511	0.693345	-3.45442	0.000551472	0.0125054
>XR_003585711.1_PREDICTED:_Ovis_aries	uncharacterized_LOC114109014	LOC114109014	transcript_variant_X2,_ncRNA	2.35446	0.681547	3.45458	0.000551158	0.0125054
>XR_003591811.1_PREDICTED:_Ovis_aries	uncharacterized_LOC114118466	LOC114118466	ncRNA	2.83201	0.821545	3.44718	0.000566467	0.0127824
>XM_027962248.1_PREDICTED:_Ovis_aries	early_growth_response_2	EGR2	mRNA	-1.6619	0.482579	-3.4438	0.000573606	0.0129009
>XM_027961808.1_PREDICTED:_Ovis_aries	GRB10_interacting_GYF_protein_1	GIGYF1	transcript_variant_X2,_mRNA	1.53773	0.447005	3.44006	0.000581578	0.0130328
>XM_012190012.3_PREDICTED:_Ovis_aries	solute_carrier_family_7_member_6	SLC7A6	transcript_variant_X1,_mRNA	1.64341	0.478405	3.43518	0.000592168	0.0131747
>XM_027977540.1_PREDICTED:_Ovis_aries	synaptotagmin_3	SYT3	mRNA	1.53061	0.44579	3.43347	0.000595903	0.0132221
>XM_027957506.1_PREDICTED:_Ovis_aries	granzyme_B-like	GZMB	mRNA	-3.40864	0.993152	-3.43215	0.000598821	0.0132512
>XM_004010625.4_PREDICTED:_Ovis_aries	galactokinase_2	GALK2	transcript_variant_X2,_mRNA	-1.53498	0.448621	-3.42156	0.000622631	0.0136438
>NM_001142508.1_Ovis_aries	cyclin_dependent_kinase_1	CDK1	mRNA	-1.69074	0.49429	-3.42055	0.000624936	0.0136634
>XM_004011861.4_PREDICTED:_Ovis_aries	sorting_nexin_16	SNX16	transcript_variant_X2,_mRNA	1.71556	0.50156	3.42045	0.00062518	0.0136634
>XR_003589331.1_PREDICTED:_Ovis_aries	SURP_and_G-patch_domain_containing_2	SUGP2	transcript_variant_X4,_misc_RNA	1.51318	0.442891	3.41659	0.000634115	0.0137735
>XM_015105086.2_PREDICTED:_Ovis_aries	ALG13_UDP-N-acetylglucosaminyltransferase_subunit	ALG13	transcript_variant_X4,_mRNA	1.54353	0.452395	3.41192	0.000645078	0.0139748
>XM_027960861.1_PREDICTED:_Ovis_aries	erythrocyte_membrane_protein_band_4.1_like_3	EPB41L3	transcript_variant_X7,_mRNA	1.83066	0.536696	3.41098	0.000647298	0.0139984
>XM_027960049.1_PREDICTED:_Ovis_aries	Hikeshi,_heat_shock_protein_nuclear_import_factor	HIKESHI	transcript_variant_X2,_mRNA	-1.52621	0.450184	-3.3902	0.000698412	0.0148779
>XR_003591764.1_PREDICTED:_Ovis_aries	uncharacterized_LOC114118398	LOC114118398	ncRNA	-1.73374	0.511854	-3.38717	0.000706169	0.0149577
>XM_027978111.1_PREDICTED:_Ovis_aries	solute_carrier_family_7_member_6	SLC7A6	transcript_variant_X4,_mRNA	1.75482	0.51855	3.38408	0.000714174	0.0150756
>XM_042255849.1_PREDICTED:_Ovis_aries	ABI_family_member_3	ABI3	mRNA	-2.58327	0.764073	-3.38092	0.000722425	0.0151979
>XM_027976261.1_PREDICTED:_Ovis_aries	plasma_membrane_calcium-transporting_ATPase_4-like	ATP2B4	mRNA	1.62983	0.483982	3.36754	0.000758432	0.0157413
>XM_015102359.2_PREDICTED:_Ovis_aries	HESX_homeobox_1	HESX1	transcript_variant_X2,_mRNA	1.86096	0.554478	3.35624	0.000790095	0.0162215
>XM_027973682.1_PREDICTED:_Ovis_aries	paraspeckle_component_1	PSPC1	transcript_variant_X6,_mRNA	-1.53607	0.459781	-3.34088	0.000835132	0.0168115
>XM_027957210.1_PREDICTED:_Ovis_aries	granzyme_H-like	GZMH	transcript_variant_X2,_mRNA	-2.21656	0.663928	-3.33856	0.000842148	0.0169113
>NM_001123004.1_Ovis_aries	Fc_fragment_of_IgE_receptor_Ia	FCER1A	mRNA	-1.65784	0.496993	-3.33575	0.000850687	0.0170275
>XM_027964769.1_PREDICTED:_Ovis_aries	frizzled_related_protein	FRZB	transcript_variant_X1,_mRNA	-2.46315	0.739592	-3.33042	0.000867159	0.0172804
>XM_012188064.3_PREDICTED:_Ovis_aries	aurora_kinase_A	AURKA	transcript_variant_X1,_mRNA	-1.52824	0.459043	-3.32918	0.000871005	0.0172804
>XM_012184472.2_PREDICTED:_Ovis_aries	RCC1_and_BTB_domain_containing_protein_1	RCBTB1	transcript_variant_X5,_mRNA	-1.56245	0.469375	-3.32879	0.000872241	0.0172911
>XM_027968590.1_PREDICTED:_Ovis_aries	laminin_subunit_beta_1	LAMB1	mRNA	-2.87294	0.865405	-3.31976	0.000900949	0.0176959
>XM_027964615.1_PREDICTED:_Ovis_aries	BLK_proto-oncogene,_Src_family_tyrosine_kinase	BLK	mRNA	1.84361	0.555342	3.31978	0.000900891	0.0176959
>XM_027957211.1_PREDICTED:_Ovis_aries	granzyme_H-like	GZMH	transcript_variant_X3,_mRNA	-2.25584	0.680328	-3.31581	0.000913778	0.0178288
>XR_001039103.3_PREDICTED:_Ovis_aries	far_upstream_element_binding_protein_1	FUBP1	transcript_variant_X2,_misc_RNA	1.51637	0.457629	3.31353	0.000921266	0.0179324
>XR_003590505.1_PREDICTED:_Ovis_aries	citrate_lyase_beta_like	CLYBL	transcript_variant_X5,_misc_RNA	1.86935	0.567858	3.29193	0.000995019	0.0190976
>XM_012095636.3_PREDICTED:_Ovis_aries	60S_ribosomal_protein_L10-like	LOC101118727	mRNA	-1.91052	0.582512	-3.27979	0.00103885	0.0197145
>XM_027967887.1_PREDICTED:_Ovis_aries	antigen_WC1.1-like	WC1.1L	mRNA	3.08111	0.940938	3.2745	0.00105848	0.0199594
>XM_027970596.1_PREDICTED:_Ovis_aries	germinal_center_associated_signaling_and_motility_like	GCSAML	mRNA	-1.59355	0.486831	-3.27333	0.0010629	0.0200271
>XM_027973393.1_PREDICTED:_Ovis_aries	zinc_finger_protein_34	ZNF34	transcript_variant_X5,_mRNA	1.72306	0.526761	3.27104	0.00107151	0.0201437
>XR_003587462.1_PREDICTED:_Ovis_aries	uncharacterized_LOC114111407	LOC114111407	ncRNA	1.72412	0.527332	3.26952	0.00107729	0.0202063
>XM_004005059.4_PREDICTED:_Ovis_aries	putative_60S_ribosomal_protein_L37a	LOC101123533	mRNA	-2.00622	0.614709	-3.26369	0.00109972	0.0205181
>XM_027966810.1_PREDICTED:_Ovis_aries	coiled-coil_domain_containing_85A	CCDC85A	transcript_variant_X2,_mRNA	-2.98493	0.915475	-3.26053	0.00111205	0.020717
>XR_003585550.1_PREDICTED:_Ovis_aries	uncharacterized_LOC114108823	LOC114108823	ncRNA	1.93971	0.597114	3.24848	0.00116024	0.0213257
>XM_027978528.1_PREDICTED:_Ovis_aries	BCL2_binding_component_3	BBC3	transcript_variant_X1,_mRNA	-1.7318	0.534112	-3.2424	0.00118529	0.0217538
>NM_001280691.1_Ovis_aries	endothelin_3	EDN3	mRNA	-1.58624	0.48935	-3.24152	0.00118895	0.0218048
>XM_027977986.1_PREDICTED:_Ovis_aries	NLR_family_pyrin_domain_containing_2	NLRP2	mRNA	-2.05234	0.63369	-3.23871	0.00120071	0.0219554
>XR_003590439.1_PREDICTED:_Ovis_aries	uncharacterized_LOC114116588	LOC114116588	ncRNA	-4.8844	1.50971	-3.23531	0.00121511	0.0221695
>XM_027973622.1_PREDICTED:_Ovis_aries	ubiquitin-40S_ribosomal_protein_S27a	RPS27A	mRNA	-2.07133	0.640742	-3.2327	0.00122626	0.0223498
>XR_003590499.1_PREDICTED:_Ovis_aries	uncharacterized_LOC114116635	LOC114116635	ncRNA	-1.73428	0.536894	-3.23021	0.001237	0.0225025
>XM_027957212.1_PREDICTED:_Ovis_aries	granzyme_H-like	GZMH	transcript_variant_X4,_mRNA	-2.26165	0.700554	-3.22837	0.00124499	0.0225979
>XM_027967058.1_PREDICTED:_Ovis_aries	AF4/FMR2_family_member_3-like	AFF3	transcript_variant_X2,_mRNA	1.84985	0.574209	3.22156	0.00127495	0.0230572
>XM_027969778.1_PREDICTED:_Ovis_aries	adhesion_G_protein-coupled_receptor_E1	ADGRE1	transcript_variant_X4,_mRNA	-1.61961	0.504261	-3.21186	0.00131881	0.0236567
>NM_001306124.1_Ovis_aries	bactericidal_permeability_increasing_protein	BPI	mRNA	-1.51472	0.471827	-3.21034	0.00132579	0.0237338
>XM_027969505.1_PREDICTED:_Ovis_aries	adhesion_G_protein-coupled_receptor_L1	ADGRL1	transcript_variant_X6,_mRNA	1.74912	0.544822	3.21045	0.00132529	0.0237338
>XM_004003202.3_PREDICTED:_Ovis_aries	protein_phosphatase,_Mg2+/Mn2+_dependent_1L	PPM1L	transcript_variant_X1,_mRNA	-2.67413	0.833617	-3.20786	0.00133727	0.0238398
>XM_015103500.2_PREDICTED:_Ovis_aries	dedicator_of_cytokinesis_1	DOCK1	mRNA	-2.47975	0.772981	-3.20804	0.00133642	0.0238398
>XR_003589962.1_PREDICTED:_Ovis_aries	ribosomal_protein_S6_kinase_like_1	RPS6KL1	transcript_variant_X2,_misc_RNA	1.955	0.609488	3.20761	0.00133843	0.0238398
>XM_027979604.1_PREDICTED:_Ovis_aries	interphotoreceptor_matrix_proteoglycan_2	IMPG2	mRNA	2.26524	0.707493	3.20178	0.00136581	0.024216
>XM_027979284.1_PREDICTED:_Ovis_aries	coiled-coil_domain_containing_84	CCDC84	transcript_variant_X4,_mRNA	1.73721	0.544494	3.19051	0.00142024	0.0247966
>XM_004002378.4_PREDICTED:_Ovis_aries	tripartite_motif_containing_45	TRIM45	mRNA	2.41516	0.757757	3.18725	0.00143632	0.0249716
>XM_012104920.3_PREDICTED:_Ovis_aries	bone_morphogenetic_protein_receptor_type_1A	BMPR1A	transcript_variant_X1,_mRNA	-3.13076	0.985545	-3.17667	0.00148974	0.0255843
>XM_027979082.1_PREDICTED:_Ovis_aries	proteoglycan_3-like	PRG3	mRNA	-4.53143	1.4275	-3.17437	0.00150163	0.0257185
>XM_015096908.2_PREDICTED:_Ovis_aries	angiogenin-2-like	ANGPT2	mRNA	-1.6437	0.517993	-3.1732	0.00150768	0.0257953
>XR_003588130.1_PREDICTED:_Ovis_aries	uncharacterized_LOC114112990	LOC114112990	ncRNA	-2.0404	0.643141	-3.17255	0.00151105	0.0257995
>XM_015105087.2_PREDICTED:_Ovis_aries	ALG13_UDP-N-acetylglucosaminyltransferase_subunit	ALG13	transcript_variant_X5,_mRNA	2.07853	0.655606	3.1704	0.00152228	0.0259197
>XM_012175432.3_PREDICTED:_Ovis_aries	C-type_lectin_domain_family_2_member_D11	CLEC2D	transcript_variant_X1,_mRNA	-1.5646	0.493573	-3.16994	0.00152471	0.0259431
>XR_003589961.1_PREDICTED:_Ovis_aries	ribosomal_protein_S6_kinase_like_1	RPS6KL1	transcript_variant_X1,_misc_RNA	2.45929	0.776052	3.16898	0.00152974	0.025993
>XM_004003025.4_PREDICTED:_Ovis_aries	3-hydroxybutyrate_dehydrogenase_1	BDH1	transcript_variant_X1,_mRNA	-1.57589	0.497399	-3.16827	0.00153352	0.0260392
>XM_012139940.3_PREDICTED:_Ovis_aries	STEAP3_metalloreductase	STEAP3	mRNA	-1.98208	0.625835	-3.1671	0.00153969	0.0260724
>XM_027978209.1_PREDICTED:_Ovis_aries	programmed_cell_death_2_like	PDCD2L	mRNA	-1.60618	0.507276	-3.16628	0.00154403	0.0261103
>XM_012103540.3_PREDICTED:_Ovis_aries	erythrocyte_membrane_protein_band_4.1_like_3	EPB41L3	transcript_variant_X4,_mRNA	1.80186	0.569283	3.16513	0.00155013	0.0261598
>XM_027975616.1_PREDICTED:_Ovis_aries	dynamin_3	DNM3	transcript_variant_X9,_mRNA	2.07902	0.656948	3.16467	0.00155259	0.0261834
>XM_012105586.3_PREDICTED:_Ovis_aries	angiotensinogen	AGT	mRNA	-3.23347	1.02756	-3.14674	0.001651	0.0274685
>XM_027961379.1_PREDICTED:_Ovis_aries	paired_immunoglobin-like_type_2_receptor_beta	PILRB	mRNA	-1.80726	0.574567	-3.14543	0.00165841	0.0275149
>XM_027978219.1_PREDICTED:_Ovis_aries	zinc_finger_protein_181	ZNF181	transcript_variant_X1,_mRNA	-1.68944	0.538187	-3.13912	0.00169453	0.0279485
>XM_027968507.1_PREDICTED:_Ovis_aries	Rap_guanine_nucleotide_exchange_factor_5	RAPGEF5	transcript_variant_X1,_mRNA	-2.4827	0.791642	-3.13613	0.00171191	0.0281413
>NM_001009760.1_Ovis_aries	growth_hormone_secretagogue_receptor	GHSR	mRNA	1.53943	0.491421	3.1326	0.00173262	0.0283312
>XM_004016991.3_PREDICTED:_Ovis_aries	granzyme_A	GZMA	mRNA	-2.24181	0.716846	-3.12733	0.00176404	0.0287409
>XR_003586460.1_PREDICTED:_Ovis_aries	uncharacterized_LOC114110105	LOC114110105	transcript_variant_X3,_ncRNA	1.64055	0.524603	3.12722	0.00176465	0.0287409
>XM_027972029.1_PREDICTED:_Ovis_aries	ribosomal_protein_S6_kinase_like_1	RPS6KL1	transcript_variant_X4,_mRNA	1.9819	0.63425	3.12479	0.0017793	0.0289413
>XM_027976029.1_PREDICTED:_Ovis_aries	ubiquitin_conjugating_enzyme_E2_T	UBE2T	transcript_variant_X1,_mRNA	-1.97192	0.63161	-3.12205	0.00179599	0.0290649
>XM_012107246.2_PREDICTED:_Ovis_aries	40S_ribosomal_protein_S4,_X_isoform-like	LOC101102787	mRNA	-2.38215	0.766095	-3.10947	0.00187422	0.0300508
>XM_027972439.1_PREDICTED:_Ovis_aries	serine_and_arginine_rich_splicing_factor_12	SRSF12	transcript_variant_X1,_mRNA	-1.54902	0.498764	-3.10572	0.00189818	0.0302584
>XM_015094829.2_PREDICTED:_Ovis_aries	choline_phosphotransferase_1	CHPT1	transcript_variant_X1,_mRNA	-1.90127	0.612498	-3.10412	0.00190846	0.0303831
>XR_003589213.1_PREDICTED:_Ovis_aries	solute_carrier_family_37_member_3	SLC37A3	transcript_variant_X2,_misc_RNA	2.00129	0.644995	3.10281	0.00191695	0.0304689
>XM_012108068.3_PREDICTED:_Ovis_aries	CTP_synthase_1	CTPS1	transcript_variant_X2,_mRNA	1.59869	0.516664	3.09426	0.00197301	0.0312099
>XM_012173944.3_PREDICTED:_Ovis_aries	pleckstrin_homology_like_domain_family_A_member_1	PHLDA1	mRNA	-1.99706	0.646208	-3.09044	0.00199861	0.0315364
>NM_001075100.2_Ovis_aries	cytochrome_P450,_family_11,_subfamily_B,_polypeptide_1	CYP11B1	mRNA	-2.27507	0.736984	-3.08701	0.00202182	0.0317183
>XR_003587033.1_PREDICTED:_Ovis_aries	TAR_HIV-1_RNA_binding_protein_1	TARBP1	mRNA	1.81332	0.587473	3.08665	0.00202426	0.0317366
>XM_027971590.1_PREDICTED:_Ovis_aries	REC8_meiotic_recombination_protein	REC8	transcript_variant_X1,_mRNA	1.65218	0.535385	3.08597	0.00202893	0.0317552
>XM_027978631.1_PREDICTED:_Ovis_aries	carnitine_palmitoyltransferase_1C	CPT1C	transcript_variant_X3,_mRNA	1.5054	0.487903	3.08545	0.00203245	0.0317844
>XM_004010584.4_PREDICTED:_Ovis_aries	meiosis_specific_nuclear_structural_1	MNS1	mRNA	-1.95901	0.637025	-3.07526	0.00210322	0.0325821
>XM_027972279.1_PREDICTED:_Ovis_aries	GAS2-like_protein_1	GAS2L1	mRNA	2.03844	0.663709	3.07129	0.00213133	0.0329087
>XM_027957928.1_PREDICTED:_Ovis_aries	histone_H3.3-like	LOC114109364	mRNA	-1.87865	0.612061	-3.06939	0.002145	0.0330637
>XM_027972633.1_PREDICTED:_Ovis_aries	solute_carrier_family_22_member_1	SLC22A1	transcript_variant_X2,_mRNA	-2.65229	0.864554	-3.06781	0.00215632	0.0331556
>XR_003590503.1_PREDICTED:_Ovis_aries	citrate_lyase_beta_like	CLYBL	transcript_variant_X3,_misc_RNA	1.99865	0.651935	3.06571	0.00217152	0.0332653
>XM_027973408.1_PREDICTED:_Ovis_aries	nuclear_receptor_binding_protein_2	NRBP2	mRNA	1.5161	0.495295	3.061	0.00220599	0.0335854
>XM_015104672.2_PREDICTED:_Ovis_aries	cytokine_receptor_like_factor_2	CRLF2	mRNA	-1.73697	0.56801	-3.05799	0.00222829	0.0337681
>XR_003589174.1_PREDICTED:_Ovis_aries	uncharacterized_LOC105606592	LOC105606592	transcript_variant_X3,_ncRNA	-2.71719	0.888669	-3.05759	0.00223124	0.0337827
>XM_027970620.1_PREDICTED:_Ovis_aries	small_integral_membrane_protein_33	SMIM33	partial_mRNA	1.68487	0.551092	3.05733	0.0022332	0.0337885
>XM_027974707.1_PREDICTED:_Ovis_aries	collagen_type_I_alpha_1_chain	COL1A1	transcript_variant_X3,_mRNA	-3.08709	1.01118	-3.05295	0.002266	0.0341677
>XM_027963354.1_PREDICTED:_Ovis_aries	carbohydrate_sulfotransferase_7	CHST7	transcript_variant_X1,_mRNA	-1.681	0.550991	-3.05087	0.00228181	0.0343591
>XR_003591216.1_PREDICTED:_Ovis_aries	aldo-keto_reductase_family_1_member_E2	AKR1E2	transcript_variant_X11,_misc_RNA	1.79509	0.589308	3.04611	0.00231825	0.0348442
>XM_004010210.4_PREDICTED:_Ovis_aries	homer_scaffold_protein_1	HOMER1	transcript_variant_X2,_mRNA	-2.19812	0.722275	-3.04333	0.00233975	0.0350916
>XM_027972303.1_PREDICTED:_Ovis_aries	TTK_protein_kinase	TTK	transcript_variant_X3,_mRNA	-1.57101	0.516957	-3.03895	0.00237403	0.0354671
>XM_027975777.1_PREDICTED:_Ovis_aries	mindbomb_E3_ubiquitin_protein_ligase_2	MIB2	transcript_variant_X2,_mRNA	1.92718	0.634397	3.03782	0.00238297	0.0355363
>XM_027961249.1_PREDICTED:_Ovis_aries	collagen_type_VI_alpha_1_chain	COL6A1	mRNA	-4.06153	1.34044	-3.03	0.0024455	0.0361977
>XR_003591972.1_PREDICTED:_Ovis_aries	solute_carrier_family_7_member_11	SLC7A11	transcript_variant_X3,_misc_RNA	-2.95424	0.975992	-3.02691	0.00247065	0.0364701
>XM_027978810.1_PREDICTED:_Ovis_aries	putative_killer_cell_immunoglobulin-like_receptor_like_protein_KIR3DP1	KIR3DP1	mRNA	1.90582	0.630008	3.02507	0.00248579	0.0366499
>XM_027978558.1_PREDICTED:_Ovis_aries	glutamate_ionotropic_receptor_NMDA_type_subunit_2D	GRIN2D	mRNA	-2.01743	0.667297	-3.02329	0.00250045	0.0368221
>NM_001009398.1_Ovis_aries	KAP5.4_keratin_protein	KRTAP5.4	mRNA	-2.43808	0.806687	-3.02234	0.00250828	0.0368716
>XM_027960778.1_PREDICTED:_Ovis_aries	cadherin_20	CDH20	mRNA	1.97661	0.654275	3.02107	0.00251887	0.0369614
>XM_004001831.3_PREDICTED:_Ovis_aries	hippocalcin_like_4	HPCAL4	mRNA	-2.22422	0.736891	-3.01838	0.00254126	0.0372017
>XM_012178052.3_PREDICTED:_Ovis_aries	40S_ribosomal_protein_S24-like	LOC101112316	mRNA	-2.27764	0.755075	-3.01644	0.00255759	0.0373652
>XM_012152824.3_PREDICTED:_Ovis_aries	alkaline_phosphatase,_biomineralization_associated	ALPL	transcript_variant_X1,_mRNA	-1.53581	0.509302	-3.01552	0.00256539	0.037422
>XM_004005653.4_PREDICTED:_Ovis_aries	zinc_finger_and_BTB_domain_containing_26	ZBTB26	transcript_variant_X1,_mRNA	1.71623	0.57079	3.00676	0.00264045	0.038275
>XM_027958102.1_PREDICTED:_Ovis_aries	transcriptional_adaptor_3	TADA3	transcript_variant_X7,_mRNA	-1.71855	0.572838	-3.00007	0.00269921	0.0389288
>XM_027960688.1_PREDICTED:_Ovis_aries	kelch_like_family_member_14	KLHL14	mRNA	1.89964	0.634331	2.99471	0.00274705	0.0392764
>XM_004005579.3_PREDICTED:_Ovis_aries	phospholipid_phosphatase_7_inactive	PLPP7	mRNA	1.58066	0.528123	2.99298	0.00276272	0.0393946
>XM_012190006.3_PREDICTED:_Ovis_aries	solute_carrier_family_7_member_6	SLC7A6	transcript_variant_X2,_mRNA	2.03079	0.680497	2.98428	0.00284251	0.0403
>XM_027971713.1_PREDICTED:_Ovis_aries	StAR_related_lipid_transfer_domain_containing_9	STARD9	mRNA	1.70165	0.571508	2.97747	0.00290634	0.0409849
>XM_027962403.1_PREDICTED:_Ovis_aries	cadherin_related_23	CDH23	transcript_variant_X2,_mRNA	1.5144	0.509526	2.97218	0.00295692	0.0414846
>XM_027958714.1_PREDICTED:_Ovis_aries	serpin_B9	SERPINB9	transcript_variant_X2,_mRNA	-1.78975	0.60255	-2.97029	0.00297522	0.0417036
>XM_027958907.1_PREDICTED:_Ovis_aries	BOLA_class_I_histocompatibility_antigen,_alpha_chain_BL3-7-like	OLA-I	mRNA	1.58801	0.536919	2.95763	0.00310013	0.0428956
>XR_003588855.1_PREDICTED:_Ovis_aries	uncharacterized_LOC105609280	LOC105609280	transcript_variant_X3,_ncRNA	-2.18206	0.73796	-2.95688	0.00310768	0.0429519
>XM_027961143.1_PREDICTED:_Ovis_aries	protein_O-fucosyltransferase_2	POFUT2	transcript_variant_X1,_mRNA	-1.59416	0.540101	-2.9516	0.00316129	0.0433548
>XR_003588957.1_PREDICTED:_Ovis_aries	tubulin_gamma_complex_associated_protein_6	TUBGCP6	transcript_variant_X4,_misc_RNA	1.5201	0.515695	2.94768	0.00320173	0.0436905
>XM_012101084.3_PREDICTED:_Ovis_aries	histone_H1.5	H1-5	mRNA	-1.89754	0.644738	-2.94312	0.00324923	0.0441439
>XR_003588254.1_PREDICTED:_Ovis_aries	uncharacterized_LOC105610401	LOC105610401	ncRNA	1.52343	0.518627	2.93742	0.00330957	0.0446655
>XM_012190178.3_PREDICTED:_Ovis_aries	free_fatty_acid_receptor_2	FFAR2	mRNA	-1.861	0.636724	-2.92277	0.00346933	0.0462702
>XM_027968747.1_PREDICTED:_Ovis_aries	endogenous_retrovirus_group_K_member_5_Gag_polyprotein-like	LOC106990358	transcript_variant_X1,_mRNA	2.03739	0.697378	2.9215	0.00348349	0.0463341
>XR_003591795.1_PREDICTED:_Ovis_aries	putative_protein_FAM172B	LOC101109587	transcript_variant_X4,_misc_RNA	1.75814	0.602767	2.91677	0.00353671	0.04681
>XM_027965931.1_PREDICTED:_Ovis_aries	EM4c_protein	EM4C	mRNA	1.64718	0.565293	2.91385	0.00357006	0.0469056
>XM_027974955.1_PREDICTED:_Ovis_aries	dynein_axonemal_heavy_chain_2	DNAH2	mRNA	2.05931	0.706423	2.91513	0.00355546	0.0469056
>XM_027966466.1_PREDICTED:_Ovis_aries	zinc_finger_and_BTB_domain_containing_26	ZBTB26	transcript_variant_X3,_mRNA	1.56778	0.53832	2.91235	0.00358716	0.0469991
>XM_027976197.1_PREDICTED:_Ovis_aries	MDM4_regulator_of_p53	MDM4	transcript_variant_X2,_mRNA	1.70917	0.587233	2.91054	0.00360802	0.0471725
>XM_027967057.1_PREDICTED:_Ovis_aries	AF4/FMR2_family_member_3-like	AFF3	transcript_variant_X1,_mRNA	1.72419	0.594584	2.89982	0.00373379	0.0483127
>XM_027957510.1_PREDICTED:_Ovis_aries	crystallin_gamma_S	CRYGS	transcript_variant_X2,_mRNA	2.62267	0.90466	2.89906	0.00374278	0.0483896

## Sheet: DESeq2 ENxEP
Differentially expressed transcripts between EN and EP groups
Contig	Description	Shortcut	Type	log2FoldChange	lfcSE	stat	pvalue	padj
>XM_027963970.1_PREDICTED:_Ovis_aries	60S_ribosomal_protein_L21-like	LOC114112880	mRNA	2.60889	0.410544	6.35471	2.08827e-10	5.73334e-06
>XM_027964399.1_PREDICTED:_Ovis_aries	gamma-aminobutyric_acid_type_B_receptor_subunit_2	GABBR2	mRNA	5.41945	0.908595	5.96465	2.45163e-09	3.36547e-05
>XM_027958883.1_PREDICTED:_Ovis_aries	BOLA_class_I_histocompatibility_antigen,_alpha_chain_BL3-7-like	OLA-I	transcript_variant_X6,_mRNA	1.94326	0.35114	5.53416	3.12728e-08	0.000286199
>XR_003586264.1_PREDICTED:_Ovis_aries	uncharacterized_LOC114109650	LOC114109650	ncRNA	5.83603	1.0667	5.47111	4.47236e-08	0.000306972
>XM_027968545.1_PREDICTED:_Ovis_aries	calcium_voltage-gated_channel_auxiliary_subunit_alpha2delta_1	CACNA2D1	transcript_variant_X5,_mRNA	-8.27297	1.52546	-5.42328	5.85156e-08	0.000321309
>XM_027958879.1_PREDICTED:_Ovis_aries	BOLA_class_I_histocompatibility_antigen,_alpha_chain_BL3-7-like	OLA-I	transcript_variant_X1,_mRNA	2.21974	0.436515	5.08515	3.6734e-07	0.00168089
>XR_003588088.1_PREDICTED:_Ovis_aries	uncharacterized_LOC114108710	LOC114108710	ncRNA	-4.15877	0.842481	-4.93634	7.96022e-07	0.00312211
>XM_004002220.4_PREDICTED:_Ovis_aries	phospholipid_phosphatase_related_5	PLPPR5	transcript_variant_X2,_mRNA	6.11522	1.37038	4.46241	8.10431e-06	0.0256925
>XR_003591623.1_PREDICTED:_Ovis_aries	uncharacterized_LOC114118055	LOC114118055	ncRNA	-5.14292	1.15463	-4.45416	8.42225e-06	0.0256925
>XM_004002233.4_PREDICTED:_Ovis_aries	vascular_cell_adhesion_protein_1	VCAM1	mRNA	7.49582	1.6951	4.42205	9.77684e-06	0.0268423
